# Supplementary material for: Local environmental quality positively predicts breastfeeding in the UK’s Millennium Cohort Study
Source: Evol Med Public Health. 2017 Aug 21;2017(1):120–35. doi: 10.1093/emph/eox011 (PMC5766197; doi:10.1093/emph/eox011)
Supplement: Supplementary Tables [file eox011_supp_tables.xlsx]

## Sheet: SM T1. Items Q & As
Source	Item	Question	Response options
S1 MAIN	Support sought since birth	I’d like to ask you about other kinds of support you’ve had for yourself, your baby or your family. Have you turned to any of the following for help or support since [child's name] was born?	GP (doctor)1
			Health Visitor1
			Religious group
			Drop-in centre for families1
			Telephone advice line1
			No, none of these
S1 MAIN	Frequency spends time with friends	In the past week, how often have you spent time with friends?	Every day
			3-6 times
			1-2 times
			Not at all2
			No friends2
S1 MAIN	Other parents can talk to	There are other parents I can talk to about my experiences	Strongly agree3
			Agree3
			Neither agree nor disagree
			Disagree4
			Strongly disagree4
			Can't say5
S1 MAIN	Noisy neighbours	How common is noisy neighbours or loud parties?	Very common
			Fairly common
			Not very common
			Not at all common
S1 MAIN	Racist insults or attacks	How common is insults or attacks to do with someone's race or colour?	Very common
			Fairly common
			Not very common
			Not at all common
S1 MAIN	Any places where children can play safely	Are there any places in your area where children can play safely?	No
			Yes
S1 MAIN	Feelings about neighbour friendliness	Please choose the phrase that you feel applies to most of your neighbours	Very friendly6
			Friendly6
			Neither friendly nor unfriendly
			Unfriendly7
			Very unfriendly7
			Can't say8
			Don't know8
			Not applicable8
S1 MAIN	Access to garden	Do you have access to a garden? Is that for your sole use or shared with anyone else?	No
			Yes, shared use
			Yes, sole use
S1 MAIN	Central heating in house	What kind of heating do you use?9	Central heating
			No heating10
			Coal fires10
			Wood fires or stoves
			Gas fires10
			Electric fires10
			Paraffin heaters10
			Other10
S1 MAIN	Damp or condensation	Is there every any damp or condensation on the walls in your home?	Yes
			No
S1 MAIN	Satisfaction with home	Which of these phrases best describes how you feel about your home?	Very dissatisfied
			Faily dissatisfied
			Neither satisfied nor dissatisfied
			Fairly satisfied
			Very satisfied
S1 MAIN	Rubbish and litter	How common is rubbish or litter lying around?	Very common
			Fairly common
			Not very common
			Not at all common
S1 MAIN	Vandalism and damage to property	How common is vandalism or deliberate damage to property?	Very common
			Fairly common
			Not very common
			Not at all common
S1 MAIN	Poor public transport	How common is poor public transport?	Very common
			Fairly common
			Not very common
			Not at all common
S1 MAIN	Food shops in easy access	How common is food shops and supermarkets that are easy to get to?	Very common
			Fairly common
			Not very common
			Not at all common
S1 MAIN	Pollution, grime, environmental problems	How common is pollution, grime or other environmental problems?	Very common
			Fairly common
			Not very common
			Not at all common
S1 MAIN	Satisfaction with area	How satisfied or dissatisfied are you with the area you live in. By your area, I mean within about a mile or 20 minutes walk of here?	Very dissatisfied
			Faily dissatisfied
			Neither satisfied nor dissatisfied
			Fairly satisfied
			Very satisfied
S2 MAIN	How safe feel in area	Which of these phrases best describes how safe you feel the area you live in is?	Very unsafe
			Fairly unsafe
			Neither safe nor unsafe
			Fairly safe
			Very safe
S2 MAIN	Good area to bring up children	Is this a good area to bring up children?	Very poor
			Poor
			Average
			Good
			Excellent
S2 NA	General condition of buildings on the street	How would you rate the general condition of most of the residences or other buildings in the street?	Well kept, good repair & exterior surfaces
			Fair condition
			Poor condition, peeling paint, broken windows
			Badly deteriorated
S2 NA	Security blinds etc.	Do any of the fronts of residential or commercial units have metal security blinds, gates, or iron bars & grilles?	None
			Some
			Most
S2 NA	Volume of traffic	How would you rate the volume of traffic on the street?	No traffic permitted
			Light
			Moderate
			Heavy
S2 NA	Burnt out cars on the street	Are there any abandoned or burnt-out cars on the street?	Yes
			No
S2 NA	Litter etc. in the street or on the pavement	Is there any of the following: rubbish, litter, broken glass, drug related items, beer cans etc, cigarette ends or discarded packs - in the street or on the pavement?	None or almost none
			Yes, some
			Yes, just about everywhere you look
S2 NA	Dog mess on the pavement	Is there dog mess on the pavement?	None
			Some
			A lot
S2 NA	Graffiti on walls or in public spaces	Is there any graffiti on walls or on public spaces like bus shelters, telephone boxes or notice boards?	No
			A little
			A lot
S2 NA	Evidence of vandalism	Is there any evidence of vandalism such as broken glass from car windows, bus shelters, telephone boxes?	No
			Yes
S2 NA	Arguing or fighting on the street	Are there any adults or teenagers in the street or on the pavements arguing, fighting, drinking, or behaving in any kind of hostile or threatening way?	No–one seen in the street or pavement
			None observed behaving in hostile ways
			Yes, one or two arguing etc.11
			Yes, at least one group of three or more11
S2 NA	Observer feeling in the street	How did you feel parking, walking, waiting at the door in the street?	Very comfortable, can imagine living/ shopping here
			Comfortable - a safe and friendly place
			Fairly safe and comfortable
			I would be uncomfortable living/ working/shopping here
			I felt like an outsider, looked on suspiciously
			I felt afraid for my personal safety

## Sheet: SM T2. Descriptives
		Breastfeeding
	n	Initiation (n(%))	Duration in months (Mean (SD))
Environmental quality:
Items that did not load on to two main measures:
Support sought since birth***
No support sought	5988	3,812 (63.67%)	2.34 (3.35)
Support sought	8576	6,299 (73.46%)	2.95 (3.57)
How often spent time with friends in the last week***
Not at all	4205	2,865 (68.15%)	2.54 (3.43)
1-2 times	6374	4,555 (71.47%)	2.71 (3.44)
3-6 times	2567	1,871 (72.89%)	3.18 (3.71)
Everyday	1417	819 (57.80%)	2.26 (3.40)
Other parents to talk to***
Disagreed	1562	1,029 (65.92%)	2.27 (3.27)
Neither agreed nor disagreed	1097	717 (65.36%)	2.13 (3.20)
Agreed	11173	7,862 (70.37%)	2.81 (3.53)
Feelings about neighbour friendliness***
NA / Don't know / Can't say	734	518 (71.45%)	2.92 (3.65)
Unfriendly	372	224 (60.22%)	2.21 (3.29)
Neither friendly nor unfriendly	1852	1,311 (70.83%)	2.55 (3.43)
Friendly	11618	8,061 (69.39%)	2.72 (3.50)
Central heating in house***
No central heating	1378	855 (62.05%)	2.25 (3.39)
Central heating	13176	9,250 (70.21%)	2.75 (3.50)
Poor public transport*
Very common	1433	1,007 (70.27%)	2.53 (3.42)
Fairly common	2159	1,535 (71.10%)	2.56 (3.48)
Not very common	4839	3,303 (68.27%)	2.61 (3.44)
Not at all common	4581	3,100 (67.69%)	2.79 (3.53)
Food shops and supermarkets that are easy to get to*
Not at all common	818	548 (66.99%)	2.53 (3.42)
Not very common	1352	931 (68.86%)	2.56 (3.48)
Fairly common	4381	2,986 (68.17%)	2.61 (3.44)
Very common	7994	5,631 (70.45%)	2.79 (3.53)
Volume of traffic
Heavy	652	469 (72.04%)	3.05 (3.67)
Moderate	2053	1,415 (68.99%)	2.76 (3.57)
Light	10679	7,413 (69.45%)	2.67 (3.47)
No traffic permitted	761	508 (66.93%)	2.53 (3.45)
Exposure to current environment:
Time at current address (years)***
Less than a year	2706	1,731 (63.99%)	2.13 (3.24)
1 to 5 years	7699	5,538 (71.94%)	2.84 (3.53)
5 to 40 years	4143	2,832 (68.36%)	2.81 (3.55)
Moved house between waves***
No	10033	7,063 (70.46%)	2.81 (3.55)
Yes	4365	2,933 (67.22%)	2.44 (3.34)
Unknown	178	118 (66.29%)	2.63 (3.49)
Infant and maternal characteristics:
Parents/carers in household***
One	2222	1,113 (50.11%)	1.43 (2.75)
Two	12354	9,001 (72.92%)	2.93 (3.56)
Mother's age at baby's birth in years***
14 to 19	1087	480 (44.36%)	0.89 (2.16)
20 to 29	6596	4,333 (65.72%)	2.11 (3.16)
30 to 39	6552	5,024 (76.70%)	3.50 (3.72)
40 to 48	336	273 (81.49%)	4.48 (4.01)
Number of other children***
None	6041	4,476 (74.18%)	2.60 (3.38)
One	5128	3,488 (68.05%)	2.80 (3.52)
Two	2263	1,441 (63.70%)	2.71 (3.60)
Three to nine	1144	709 (62.03%)	2.79 (3.74)
Baby's birthweight***
Low (<2,500 g)	907	612 (67.48%)	2.07 (3.06)
Normal (2,500-4,000 g)	12005	8,275 (68.93%)	2.69 (3.49)
High (>4,000g)	1644	1,219 (74.15%)	3.11 (3.66)
Baby's ethnicity***
White	12223	8,115 (66.41%)	2.50 (3.40)
Black or Black British	437	407 (93.14%)	4.66 (3.65)
Indian, Pakistani or Bangladeshi	1294	1,067 (82.46%)	3.22 (3.65)
Mixed or Other	591	509 (86.13%)	4.28 (3.95)
Mother's immigration status***
Born in the UK and both parents born in the UK	10907	7,153 (65.61%)	2.43 (3.37)
Second generation (at least one parent born outside the UK)	1462	1,163 (79.66%)	3.19 (3.63)
First generation (arrived to UK as a child)	695	579 (83.31%)	3.52 (3.65)
First generation (arrived to UK as an adult)	1188	1,028 (86.62%)	4.37 (3.84)
Language spoken at home***
English only	12523	8,388 (67.02%)	2.53 (3.41)
English and other language(s)	1539	1,290 (83.93%)	3.78 (3.80)
Other language(s) only	514	436 (85.16%)	3.68 (3.86)
Ward-level contextual factors:
BME proportion***
0	3757	2,310 (61.50%)	2.17 (3.29)
0-5%	1880	1,195 (63.63%)	2.39 (3.36)
5-30%	5986	4,207 (70.33%)	2.73 (3.47)
30-50%	681	524 (77.06%)	3.29 (3.73)
>50%	2272	1,878 (82.77%)	3.56 (3.71)
Immigrant proportion***
0	642	401 (62.46%)	2.40 (3.44)
0-5%	898	557 (62.10%)	2.10 (3.16)
5-30%	9300	6,178 (66.47%)	2.49 (3.41)
30-50%	1282	948 (74.00%)	3.04 (3.60)
>50%	2454	2,030 (82.82%)	3.59 (3.72)
Non-English speaker proportion***
0	3006	1,863 (62.02%)	2.25 (3.33)
0-5%	2581	1,613 (62.59%)	2.29 (3.29)
5-30%	6393	4,539 (71.02%)	2.78 (3.50)
30-50%	936	773 (82.59%)	3.65 (3.72)
>50%	1660	1,326 (80.02%)	3.28 (3.69)
Urbanicity***
0	1553	1,109 (71.50%)	2.86 (3.50)
0-50%	1080	793 (73.43%)	3.08 (3.65)
50-90%	1449	1,051 (72.58%)	2.95 (3.58)
90-100%	6893	4,961 (72.01%)	2.81 (3.52)
1	3601	2,200 (61.16%)	2.20 (3.31)
Deprivation (IMD quintile)***
1 - most deprived	2949	1,836 (62.36%)	2.15 (3.29)
2	2943	1,863 (63.37%)	2.20 (3.29)
3	2874	1,845 (64.26%)	2.31 (3.27)
4	2900	2,168 (74.76%)	3.14 (3.61)
5 - least deprived	2910	2,402 (82.54%)	3.70 (3.70)

## Sheet: SM T3.Full model results incOEQ
	Initiation			Termination
	(N=13,737)			(N=9,561)
	Odds Ratio	95% Confidence Interval	P-value	Hazard Ratio	95% Confidence Interval	P-value
Objective Environmental Quality	1.537	1.229-1.922	<0.001	0.859	0.766-0.965	0.01
Moved House between waves			0.194			0.24
No	1	(ref.)	.	1	(ref.)	.
Yes	0.921	0.794-1.068	0.276	1.054	0.991-1.120	0.094
Unknown	0.555	0.243-1.268	0.162	1.068	0.751-1.519	0.714
Time at current address (years)	0.988	0.974-1.001	0.072	0.998	0.989-1.007	0.682
Parents/carers in household			<0.001			0.485
One parent/carer	1	(ref.)	.	1	(ref.)	.
Two parents/carers	1.575	1.280-1.939	<0.001	0.946	0.810-1.105	0.485
Mother's age at baby's birth in years			<0.001			<0.001
14 to 19	0.568	0.442-0.731	<0.001	1.177	0.958-1.447	0.12
20 to 29	1	(ref.)	.	1	(ref.)	.
30 to 39	1.439	1.246-1.662	<0.001	0.804	0.753-0.858	<0.001
40 to 48	2.479	1.557-3.949	<0.001	0.652	0.546-0.779	<0.001
Number of other children			<0.001			<0.001
None	1	(ref.)	.	1	(ref.)	.
one	0.524	0.455-0.604	<0.001	0.894	0.835-0.957	0.001
two	0.476	0.388-0.585	<0.001	0.808	0.723-0.902	<0.001
three to nine	0.455	0.361-0.572	<0.001	0.701	0.591-0.832	<0.001
Baby's birthweight			0.023			0.001
Low (<2,500 g)	0.767	0.588-1.001	0.051	1.264	1.113-1.436	<0.001
Normal (2,500-4,000 g)	1	(ref.)	.	1	(ref.)	.
High (>4,000g)	1.211	1.000-1.466	0.05	0.996	0.903-1.098	0.928
Baby's ethnicity			<0.001			<0.001
White	1	(ref.)	.	1	(ref.)	.
Black or Black British	7.984	3.975-16.035	<0.001	0.591	0.452-0.773	<0.001
Indian, Pakistani or Bangladeshi	0.81	0.460-1.427	0.466	0.906	0.707-1.161	0.436
Mixed or Other	2.141	1.390-3.297	0.001	0.708	0.591-0.848	<0.001
Mother's immigration status			0.003			0.001
Born in the UK and both parents born in the UK	1	(ref.)	.	1	(ref.)	.
Second generation (at least one parent born outside UK)	1.43	1.104-1.853	0.007	1.081	0.969-1.207	0.163
First generation (arrived to UK as a child)	1.657	1.141-2.406	0.008	0.886	0.744-1.055	0.173
First generation (arrived to UK as an adult)	1.866	1.191-2.924	0.007	0.751	0.631-0.894	0.001
Language spoken at home			<0.001			0.233
English only	1	(ref.)	.	1	(ref.)	.
English and other language(s)	2.885	1.664-5.002	<0.001	0.88	0.729-1.063	0.186
Other language(s) only	2.395	1.276-4.497	0.007	0.843	0.667-1.065	0.152
Income (OECD equivalised quintiles)			<0.001			0.002
Lowest	1	(ref.)	.	1	(ref.)	.
Second	1.072	0.870-1.322	0.513	0.941	0.821-1.078	0.381
Middle	1.411	1.126-1.768	0.003	0.844	0.738-0.966	0.014
Fourth	2.006	1.570-2.563	<0.001	0.8	0.699-0.916	0.001
Highest	2.181	1.587-2.999	<0.001	0.782	0.685-0.893	<0.001
Ward-level BME proportion			0.271			0.809
0	1	(ref.)	.	1	(ref.)	.
0-5%	0.99	0.702-1.395	0.953	1.019	0.882-1.178	0.801
5-30%	0.952	0.699-1.296	0.754	1.031	0.901-1.180	0.659
30-50%	1.619	0.856-3.063	0.139	0.908	0.691-1.192	0.486
>50%	2.419	0.965-6.063	0.06	0.846	0.559-1.279	0.427
Ward-level immigrant proportion			0.22			0.841
0	1	(ref.)	.	1	(ref.)	.
0-5%	1.394	0.954-2.037	0.086	1.004	0.801-1.258	0.973
5-30%	1.39	1.031-1.876	0.031	0.946	0.772-1.159	0.589
30-50%	1.261	0.753-2.113	0.378	0.947	0.738-1.215	0.667
>50%	0.917	0.390-2.158	0.843	1.071	0.710-1.614	0.744
Ward-level non-English speaker proportion			0.756			0.815
0	1	(ref.)	.	1	(ref.)	.
0-5%	0.977	0.697-1.369	0.89	0.944	0.816-1.093	0.441
5-30%	1.118	0.793-1.576	0.524	0.977	0.848-1.125	0.745
30-50%	1.219	0.670-2.217	0.517	0.882	0.669-1.164	0.376
>50%	0.879	0.386-2.002	0.758	0.804	0.519-1.246	0.329
Ward-level urbanicity			0.003			0.453
0	1.698	1.236-2.332	0.001	1.016	0.876-1.178	0.834
0-50%	1.744	1.186-2.565	0.005	0.887	0.752-1.046	0.154
50-90%	1.125	0.822-1.540	0.461	1.042	0.900-1.207	0.583
90-100%	1.305	0.986-1.726	0.062	1.04	0.928-1.165	0.504
1	1	(ref.)	.	1	(ref.)	.
Ward level IMD	1.161	1.122-1.202	<0.001	0.964	0.944-0.984	0.001
Constant	0.092	0.041-0.206	<0.001	1.346	0.898-2.017	0.15
Ward-level variance	0.216807	0.139-0.339		0.062	0.041-0.093
Individual-level variance	3.29			3.953
Variance partition coefficient	0.062	0.036-0.088	<0.001	0.015	0.009-0.021	<0.001
/ln_p				-0.438	-0.485--0.391	<0.001

## Sheet: SM T4. Inc M1-M3 (all EQ vars)
	Breastfeeding initiation									Breastfeeding termination
	M1			M2			M3			M1			M2			M3
	Odds Ratio	95% Confidence Interval	P-value	Odds Ratio	95% Confidence Interval	P-value	Odds Ratio	95% Confidence Interval	P-value	Hazard Ratio	95% Confidence Interval	P-value	Hazard Ratio	95% Confidence Interval	P-value	Hazard Ratio	95% Confidence Interval	P-value
Subjective Environmental Quality	1.125	1.026-1.234	0.012	1.014	0.928-1.108	0.759	0.964	0.880-1.057	0.438	0.91	0.864-0.959	<0.001	0.933	0.885-0.985	0.012	0.947	0.896-1.001	0.056
Income (OECD equivalised quintiles)						<0.001			<0.001						<0.001			<0.001
Lowest		-		1	(ref.)	.	1	(ref.)	.		-		1	(ref.)	.	1	(ref.)	.
Second		-		1.183	0.950-1.474	0.133	1.156	0.929-1.437	0.193		-		0.902	0.787-1.033	0.136	0.905	0.791-1.036	0.149
Middle		-		1.675	1.318-2.128	<0.001	1.599	1.263-2.024	<0.001		-		0.803	0.705-0.915	0.001	0.811	0.712-0.923	0.002
Fourth		-		2.532	1.974-3.248	<0.001	2.382	1.862-3.046	<0.001		-		0.763	0.671-0.868	<0.001	0.775	0.682-0.882	<0.001
Highest		-		2.947	2.144-4.050	<0.001	2.704	1.970-3.710	<0.001		-		0.747	0.659-0.847	<0.001	0.765	0.673-0.869	<0.001
Constant	1.079	0.677-1.718	0.749	1.302	0.842-2.017	0.237	0.354	0.198-0.632	<0.001	0.894	0.677-1.181	0.429	0.886	0.664-1.181	0.408	1.054	0.759-1.463	0.754
N	13866			13852			13852			9631			9620			9620
Objective Environmental Quality	2.086	1.651-2.634	<0.001	1.67	1.333-2.092	<0.001	1.537	1.229-1.922	<0.001	0.783	0.703-0.872	<0.001	0.841	0.751-0.942	0.003	0.859	0.766-0.965	0.01
Income (OECD equivalised quintiles)						<0.001			<0.001						<0.001			0.002
Lowest		-		1	(ref.)	.	1	(ref.)	.		-		1	(ref.)	.	1	(ref.)	.
Second		-		1.093	0.885-1.350	0.407	1.072	0.870-1.322	0.513		-		0.939	0.818-1.077	0.37	0.941	0.821-1.078	0.381
Middle		-		1.471	1.171-1.849	0.001	1.411	1.126-1.768	0.003		-		0.837	0.732-0.959	0.01	0.844	0.738-0.966	0.014
Fourth		-		2.125	1.659-2.721	<0.001	2.006	1.570-2.563	<0.001		-		0.789	0.689-0.903	0.001	0.8	0.699-0.916	0.001
Highest		-		2.37	1.721-3.263	<0.001	2.181	1.587-2.999	<0.001		-		0.765	0.672-0.871	<0.001	0.782	0.685-0.893	<0.001
Constant	0.193	0.087-0.426	<0.001	0.312	0.146-0.669	0.003	0.092	0.041-0.206	<0.001	1.275	0.900-1.808	0.172	1.109	0.773-1.592	0.575	1.346	0.898-2.017	0.15
N	13752			13737			13737			9573			9561			9561
Support sought since birth
No support sought	0.747	0.654-0.854	<0.001	0.749	0.655-0.855	<0.001	0.752	0.658-0.859	<0.001	1.05	0.989-1.114	0.11	1.043	0.983-1.108	0.165	1.043	0.982-1.107	0.171
Support sought	1	(ref.)	.	1	(ref.)	.	1	(ref.)	.	1	(ref.)	.	1	(ref.)	.	1	(ref.)	.
Income (OECD equivalised quintiles)						<0.001			<0.001						<0.001			<0.001
Lowest		-		1	(ref.)	.	1	(ref.)	.		-		1	(ref.)	.	1	(ref.)	.
Second		-		1.19	0.959-1.476	0.114	1.156	0.934-1.432	0.183		-		0.901	0.786-1.032	0.132	0.907	0.792-1.037	0.153
Middle		-		1.708	1.343-2.172	<0.001	1.608	1.270-2.037	<0.001		-		0.79	0.694-0.898	<0.001	0.802	0.705-0.912	0.001
Fourth		-		2.585	2.029-3.295	<0.001	2.383	1.875-3.029	<0.001		-		0.745	0.656-0.847	<0.001	0.763	0.671-0.868	<0.001
Highest		-		2.993	2.167-4.134	<0.001	2.686	1.947-3.704	<0.001		-		0.727	0.644-0.821	<0.001	0.75	0.662-0.850	<0.001
Constant	2.181	1.729-2.750	<0.001	1.625	1.258-2.098	<0.001	0.354	0.229-0.549	<0.001	0.569	0.438-0.671	<0.001	0.638	0.533-0.764	<0.001	0.822	0.636-1.062	0.134
N	14185			14170			14170			9881			9869			9869
How often spent time with friends in the last week			0.005			0.043			0.046			<0.001			<0.001			<0.001
Not at all	0.86	0.724-1.020	0.084	0.907	0.767-1.072	0.252	0.909	0.769-1.073	0.259	0.982	0.915-1.055	0.622	0.971	0.903-1.043	0.419	0.969	0.902-1.041	0.394
1-2 times	1	(ref.)	.	1	(ref.)	.	1	(ref.)	.	1	(ref.)	.	1	(ref.)	.	1	(ref.)	.
3-6 times	1.073	0.903-1.276	0.422	1.062	0.893-1.264	0.493	1.057	0.889-1.257	0.528	0.826	0.762-0.896	<0.001	0.827	0.762-0.897	<0.001	0.829	0.765-0.899	<0.001
Everyday	0.744	0.603-0.918	0.006	0.781	0.628-0.971	0.026	0.78	0.628-0.969	0.025	0.919	0.807-1.048	0.207	0.912	0.801-1.039	0.166	0.914	0.803-1.042	0.178
Income (OECD equivalised quintiles)						<0.001			<0.001						<0.001			<0.001
Lowest		-		1	(ref.)	.	1	(ref.)	.		-		1	(ref.)	.	1	(ref.)	.
Second		-		1.181	0.955-1.462	0.125	1.148	0.930-1.417	0.2		-		0.909	0.792-1.043	0.172	0.915	0.798-1.048	0.199
Middle		-		1.68	1.329-2.125	<0.001	1.583	1.257-1.995	<0.001		-		0.793	0.697-0.903	<0.001	0.806	0.708-0.917	0.001
Fourth		-		2.547	2.009-3.229	<0.001	2.349	1.857-2.972	<0.001		-		0.75	0.659-0.853	<0.001	0.768	0.675-0.874	<0.001
Highest		-		2.915	2.108-4.032	<0.001	2.619	1.895-3.618	<0.001		-		0.733	0.649-0.829	<0.001	0.757	0.668-0.858	<0.001
Constant	2.064	1.612-2.642	<0.001	1.528	1.166-2.003	0.002	0.328	0.208-0.516	<0.001	0.613	0.520-0.722	<0.001	0.787	0.574-0.819	<0.001	0.878	0.676-1.141	0.332
N	14184			14169			14169			9880			9868			9868
Other parents to talk to			0.909			0.751			0.779			<0.001			<0.001			<0.001
Disagree	1.046	0.794-1.377	0.751	1.106	0.834-1.466	0.484	1.099	0.829-1.456	0.511	1.015	0.868-1.185	0.856	1.017	0.871-1.188	0.827	1.015	0.869-1.185	0.854
Neither agree nor disagree	1	(ref.)	.	1	(ref.)	.	1	(ref.)	.	1	(ref.)	.	1	(ref.)	.	1	(ref.)	.
Agree	1.052	0.836-1.323	0.665	1.031	0.813-1.307	0.802	1.029	0.813-1.301	0.813	0.832	0.729-0.948	0.006	0.847	0.744-0.965	0.013	0.847	0.744-0.964	0.012
Income (OECD equivalised quintiles)						<0.001			<0.001						<0.001			<0.001
Lowest		-		1	(ref.)	.	1	(ref.)	.		-		1	(ref.)	.	1	(ref.)	.
Second		-		1.258	1.012-1.564	0.039	1.22	0.983-1.514	0.071		-		0.89	0.769-1.030	0.117	0.898	0.777-1.037	0.144
Middle		-		1.781	1.405-2.258	<0.001	1.677	1.328-2.117	<0.001		-		0.786	0.685-0.902	0.001	0.8	0.697-0.918	0.002
Fourth		-		2.671	2.088-3.416	<0.001	2.457	1.926-3.133	<0.001		-		0.742	0.647-0.851	<0.001	0.762	0.663-0.874	<0.001
Highest		-		3.171	2.299-4.373	<0.001	2.836	2.061-3.903	<0.001		-		0.728	0.640-0.829	<0.001	0.753	0.660-0.860	<0.001
Constant	1.858	1.354-2.549	<0.001	1.369	0.990-1.894	0.058	0.286	0.176-0.464	<0.001	0.662	0.533-0.822	<0.001	0.732	0.538-0.918	0.007	0.95	0.698-1.266	0.684
N	13476			13465			13465			9391			9383			9383
Feelings about neighbour friendliness			0.175			0.22			0.223			0.012			0.033			0.042
NA / Don't know / Can't say	0.693	0.492-0.977	0.036	0.717	0.505-1.017	0.062	0.727	0.514-1.027	0.071	1.146	0.920-1.427	0.224	1.139	0.911-1.425	0.252	1.13	0.905-1.411	0.281
Unfriendly	0.769	0.511-1.157	0.208	0.829	0.554-1.241	0.362	0.825	0.551-1.235	0.35	0.902	0.693-1.174	0.443	0.894	0.689-1.160	0.4	0.895	0.690-1.160	0.401
Neither friendly nor unfriendly	1	(ref.)	.	1	(ref.)	.	1	(ref.)	.	1	(ref.)	.	1	(ref.)	.	1	(ref.)	.
Friendly	0.901	0.754-1.077	0.254	0.857	0.712-1.032	0.104	0.852	0.708-1.025	0.089	0.901	0.815-0.996	0.042	0.917	0.829-1.015	0.094	0.918	0.830-1.016	0.098
Income (OECD equivalised quintiles)						<0.001			<0.001						<0.001			<0.001
Lowest		-		1	(ref.)	.	1	(ref.)	.		-		1	(ref.)	.	1	(ref.)	.
Second		-		1.195	0.964-1.480	0.104	1.161	0.939-1.435	0.168		-		0.898	0.784-1.028	0.12	0.904	0.790-1.033	0.138
Middle		-		1.715	1.350-2.179	<0.001	1.616	1.277-2.046	<0.001		-		0.791	0.695-0.899	<0.001	0.802	0.705-0.912	0.001
Fourth		-		2.62	2.052-3.346	<0.001	2.417	1.897-3.080	<0.001		-		0.75	0.661-0.851	<0.001	0.767	0.675-0.871	<0.001
Highest		-		2.995	2.159-4.155	<0.001	2.689	1.941-3.725	<0.001		-		0.733	0.650-0.826	<0.001	0.755	0.668-0.854	<0.001
Constant	2.15	1.642-2.815	<0.001	1.655	1.255-2.182	<0.001	0.359	0.227-0.569	<0.001	0.625	0.515-0.758	<0.001	0.69	0.562-0.847	<0.001	0.885	0.673-1.162	0.379
N	14187			14172			14172			9883			9871			9871
Central heating in house
No central heating	0.752	0.600-0.942	0.013	0.844	0.677-1.053	0.133	0.857	0.688-1.067	0.168	0.908	0.797-1.036	0.152	0.87	0.763-0.991	0.037	0.867	0.762-0.987	0.031
Central heating	1	(ref.)	.	1	(ref.)	.	1	(ref.)	.	1	(ref.)	.	1	(ref.)	.	1	(ref.)	.
Income (OECD equivalised quintiles)						<0.001			<0.001						<0.001			<0.001
Lowest		-		1	(ref.)	.	1	(ref.)	.		-		1	(ref.)	.	1	(ref.)	.
Second		-		1.199	0.969-1.483	0.095	1.165	0.943-1.438	0.156		-		0.897	0.783-1.028	0.117	0.903	0.789-1.033	0.136
Middle		-		1.708	1.349-2.163	<0.001	1.61	1.276-2.032	<0.001		-		0.78	0.685-0.888	<0.001	0.792	0.696-0.902	<0.001
Fourth		-		2.577	2.021-3.284	<0.001	2.379	1.871-3.025	<0.001		-		0.732	0.644-0.831	<0.001	0.749	0.659-0.852	<0.001
Highest		-		2.952	2.140-4.072	<0.001	2.653	1.926-3.655	<0.001		-		0.713	0.632-0.804	<0.001	0.736	0.650-0.833	<0.001
Constant	2.03	1.617-2.548	<0.001	1.49	1.166-1.906	0.001	0.32	0.206-0.496	<0.001	0.586	0.498-0.689	<0.001	0.664	0.556-0.792	<0.001	0.851	0.658-1.102	0.222
N	14186			14171			14171			9882			9870			9870
Poor public transport			0.1			0.052			0.185			0.197			0.165			0.208
Very common	1.12	0.881-1.424	0.355	1.158	0.913-1.469	0.227	1.07	0.842-1.360	0.579	0.885	0.781-1.003	0.056	0.88	0.779-0.995	0.042	0.891	0.787-1.010	0.071
Fairly common	1.246	1.005-1.546	0.045	1.282	1.029-1.596	0.027	1.226	0.983-1.529	0.07	0.996	0.909-1.092	0.939	0.993	0.905-1.089	0.886	1.002	0.913-1.100	0.96
Not very common	0.987	0.844-1.155	0.875	0.996	0.850-1.166	0.957	0.982	0.838-1.151	0.823	0.992	0.911-1.080	0.854	0.988	0.905-1.078	0.787	0.995	0.911-1.086	0.908
Not at all common	1	(ref.)	.	1	(ref.)	.	1	(ref.)	.	1	(ref.)	.	1	(ref.)	.	1	(ref.)	.
Income (OECD equivalised quintiles)						<0.001			<0.001						<0.001			<0.001
Lowest		-		1	(ref.)	.	1	(ref.)	.		-		1	(ref.)	.	1	(ref.)	.
Second		-		1.255	1.006-1.566	0.044	1.216	0.977-1.514	0.08		-		0.909	0.796-1.038	0.158	0.915	0.802-1.043	0.185
Middle		-		1.825	1.429-2.329	<0.001	1.705	1.340-2.170	<0.001		-		0.781	0.682-0.896	<0.001	0.794	0.692-0.911	0.001
Fourth		-		2.826	2.203-3.626	<0.001	2.582	2.019-3.303	<0.001		-		0.736	0.645-0.840	<0.001	0.754	0.660-0.862	<0.001
Highest		-		3.498	2.476-4.942	<0.001	3.098	2.195-4.371	<0.001		-		0.704	0.624-0.795	<0.001	0.728	0.643-0.824	<0.001
Constant	1.86	1.438-2.407	<0.001	1.311	0.987-1.742	0.061	0.317	0.183-0.548	<0.001	0.611	0.510-0.731	<0.001	0.691	0.571-0.836	<0.001	0.886	0.677-1.160	0.38
N	12673			12659			12659			8742			8731			8731
Food shops and supermarkets that are easy to get to			0.23			0.379			0.203			0.246			0.184			0.269
Not at all common	0.931	0.720-1.203	0.583	0.957	0.738-1.241	0.738	0.91	0.702-1.179	0.477	0.872	0.753-1.011	0.069	0.868	0.748-1.007	0.062	0.881	0.761-1.019	0.087
Not very common	0.84	0.692-1.020	0.078	0.858	0.707-1.042	0.122	0.826	0.680-1.005	0.056	0.965	0.838-1.111	0.617	0.958	0.832-1.103	0.549	0.965	0.836-1.114	0.627
Fairly common	0.894	0.778-1.028	0.116	0.919	0.803-1.052	0.221	0.902	0.788-1.032	0.134	0.969	0.908-1.034	0.342	0.962	0.901-1.026	0.237	0.965	0.904-1.030	0.284
Very common	1	(ref.)	.	1	(ref.)	.	1	(ref.)	.	1	(ref.)	.	1	(ref.)	.	1	(ref.)	.
Income (OECD equivalised quintiles)						<0.001			<0.001						<0.001			<0.001
Lowest				1	(ref.)	.	1	(ref.)	.		-		1	(ref.)	.	1	(ref.)	.
Second				1.203	0.970-1.492	0.093	1.168	0.944-1.446	0.153		-		0.897	0.783-1.027	0.115	0.903	0.789-1.032	0.134
Middle				1.719	1.355-2.180	<0.001	1.616	1.279-2.041	<0.001		-		0.786	0.691-0.893	<0.001	0.797	0.701-0.907	0.001
Fourth				2.61	2.051-3.322	<0.001	2.405	1.895-3.052	<0.001		-		0.74	0.652-0.840	<0.001	0.758	0.667-0.861	<0.001
Highest				2.991	2.164-4.133	<0.001	2.681	1.944-3.697	<0.001		-		0.721	0.639-0.814	<0.001	0.745	0.658-0.843	<0.001
Constant	2.069	1.655-2.587	<0.001	1.517	1.191-1.934	0.001	0.326	0.212-0.501	<0.001	0.595	0.505-0.701	<0.001	0.67	0.560-0.802	<0.001	0.856	0.664-1.103	0.229
N	14177			14162			14162			9873			9861			9861
Volume of traffic			0.303			0.315			0.298			0.566			0.432			0.413
Heavy	1.422	0.985-2.051	0.06	1.43	0.983-2.079	0.061	1.454	0.992-2.133	0.055	0.951	0.823-1.099	0.499	0.95	0.822-1.099	0.492	0.945	0.819-1.091	0.44
Moderate	0.974	0.818-1.161	0.773	1.002	0.840-1.195	0.986	1.007	0.844-1.202	0.934	0.945	0.866-1.032	0.206	0.935	0.857-1.021	0.132	0.934	0.856-1.019	0.125
Light	1	(ref.)	.	1	(ref.)	.	1	(ref.)	.	1	(ref.)	.	1	(ref.)	.	1	(ref.)	.
No traffic permitted	1.002	0.761-1.319	0.989	1.027	0.780-1.351	0.851	1.003	0.764-1.315	0.985	0.973	0.863-1.096	0.648	0.961	0.851-1.087	0.529	0.971	0.860-1.095	0.629
Income (OECD equivalised quintiles)						<0.001			<0.001						<0.001			<0.001
Lowest		-		1	(ref.)	.	1	(ref.)	.		-		1	(ref.)	.	1	(ref.)	.
Second		-		1.164	0.939-1.443	0.167	1.129	0.913-1.396	0.262		-		0.911	0.794-1.045	0.182	0.917	0.800-1.050	0.21
Middle		-		1.682	1.338-2.115	<0.001	1.58	1.261-1.978	<0.001		-		0.798	0.699-0.911	0.001	0.811	0.710-0.926	0.002
Fourth		-		2.515	1.967-3.216	<0.001	2.313	1.815-2.949	<0.001		-		0.745	0.653-0.849	<0.001	0.763	0.669-0.871	<0.001
Highest		-		2.854	2.065-3.944	<0.001	2.549	1.848-3.515	<0.001		-		0.718	0.635-0.812	<0.001	0.742	0.654-0.843	<0.001
Constant	1.961	1.555-2.473	<0.001	1.469	1.143-1.887	0.003	0.309	0.202-0.472	<0.001	0.587	0.497-0.693	<0.001	0.657	0.549-0.786	<0.001	0.879	0.675-1.145	0.34
N	13782			13767			13767			9594			9582			9582

## Sheet: SMT5. JS M1-3 (all EQ vars)
	Initiation									Termination
	M1			M2			M3			M1			M2			M3
	Odds Ratio	95% Confidence Interval	P-value	Odds Ratio	95% Confidence Interval	P-value	Odds Ratio	95% Confidence Interval	P-value	Hazard Ratio	95% Confidence Interval	P-value	Hazard Ratio	95% Confidence Interval	P-value	Hazard Ratio	95% Confidence Interval	P-value
Subjective Environmental Quality	1.125	1.026-1.234	0.012	1.031	0.940-1.130	0.521	0.978	0.889-1.075	0.646	0.91	0.864-0.959	<0.001	0.944	0.895-0.995	0.032	0.959	0.907-1.013	0.131
Job status (NS-SEC)						<0.001			<0.001						<0.001			<0.001
Not applicable		-		1	(ref.)	.	1	(ref.)	.		-		1	(ref.)	.	1	(ref.)	.
Routine and manual		-		1.226	0.907-1.657	0.186	1.204	0.889-1.631	0.229		-		1.058	0.857-1.307	0.599	1.057	0.854-1.308	0.609
Intermediate		-		1.74	1.243-2.435	0.001	1.685	1.205-2.356	0.002		-		0.801	0.647-0.990	0.04	0.801	0.646-0.992	0.042
Higher managerial, administrative and professional		-		2.867	2.053-4.004	<0.001	2.703	1.939-3.767	<0.001		-		0.716	0.585-0.876	0.001	0.723	0.590-0.885	0.002
Constant	1.079	0.677-1.718	0.749	1.022	0.605-1.725	0.935	0.271	0.138-0.533	<0.001	0.894	0.677-1.181	0.429	0.856	0.607-1.209	0.378	0.987	0.676-1.441	0.947
N	13866			13866			13866			9631			9631			9631
Objective Environmental Quality	2.086	1.651-2.634	<0.001	1.68	1.348-2.094	<0.001	1.535	1.234-1.909	<0.001	0.783	0.703-0.872	<0.001	0.873	0.779-0.979	0.02	0.893	0.795-1.004	0.059
Job status (NS-SEC)						<0.001			<0.001						<0.001			<0.001
Not applicable		-		1	(ref.)	.	1	(ref.)	.		-		1	(ref.)	.	1	(ref.)	.
Routine and manual		-		1.141	0.829-1.571	0.418	1.124	0.815-1.550	0.476		-		1.03	0.837-1.267	0.782	1.03	0.835-1.269	0.784
Intermediate		-		1.463	1.011-2.119	0.044	1.42	0.981-2.055	0.063		-		0.785	0.636-0.968	0.024	0.786	0.636-0.972	0.026
Higher managerial, administrative and professional		-		2.457	1.711-3.528	<0.001	2.328	1.623-3.341	<0.001		-		0.696	0.571-0.849	<0.001	0.703	0.576-0.858	0.001
Constant	0.193	0.087-0.426	<0.001	0.269	0.118-0.616	0.002	0.08	0.033-0.196	<0.001	1.275	0.900-1.808	0.172	1.042	0.690-1.573	0.844	1.231	0.786-1.929	0.364
N	13752			13752			13752			9573			9573			9573
Support sought since birth
No support sought	0.747	0.654-0.854	<0.001	0.757	0.661-0.867	<0.001	0.76	0.664-0.869	<0.001	1.05	0.989-1.114	0.11	1.035	0.977-1.096	0.247	1.034	0.976-1.096	0.251
Support sought	1	(ref.)	.	1	(ref.)	.	1	(ref.)	.	1	(ref.)	.	1	(ref.)	.	1	(ref.)	.
Job status (NS-SEC)						<0.001			<0.001						<0.001			<0.001
Not applicable		-		1	(ref.)	.	1	(ref.)	.		-		1	(ref.)	.	1	(ref.)	.
Routine and manual		-		1.206	0.905-1.607	0.2	1.182	0.887-1.577	0.254		-		1.05	0.854-1.289	0.645	1.051	0.854-1.293	0.639
Intermediate		-		1.702	1.226-2.363	0.001	1.627	1.173-2.257	0.004		-		0.788	0.638-0.974	0.027	0.793	0.641-0.982	0.033
Higher managerial, administrative and professional		-		2.889	2.085-4.003	<0.001	2.679	1.938-3.702	<0.001		-		0.702	0.576-0.856	<0.001	0.714	0.585-0.871	0.001
Constant	2.181	1.729-2.750	<0.001	1.392	0.955-2.031	0.086	0.297	0.172-0.512	<0.001	0.569	0.483-0.671	<0.001	0.654	0.513-0.833	0.001	0.815	0.607-1.096	0.176
N	14185			14185			14185			9881			9881			9881
How often spent time with friends in the last week			0.005			0.028			0.034			<0.001			<0.001			<0.001
Not at all	0.86	0.724-1.020	0.084	0.891	0.751-1.057	0.186	0.895	0.755-1.061	0.201	0.982	0.915-1.055	0.622	0.973	0.907-1.044	0.443	0.971	0.905-1.042	0.412
1-2 times	1	(ref.)	.	1	(ref.)	.	1	(ref.)	.	1	(ref.)	.	1	(ref.)	.	1	(ref.)	.
3-6 times	1.073	0.903-1.276	0.422	1.068	0.896-1.272	0.464	1.06	0.891-1.262	0.509	0.826	0.762-0.896	<0.001	0.832	0.766-0.904	<0.001	0.834	0.768-0.906	<0.001
Everyday	0.744	0.603-0.918	0.006	0.777	0.626-0.963	0.021	0.777	0.627-0.964	0.022	0.919	0.807-1.048	0.207	0.912	0.800-1.041	0.171	0.914	0.801-1.043	0.182
Job status (NS-SEC)						<0.001			<0.001						<0.001			<0.001
Not applicable		-		1	(ref.)	.	1	(ref.)	.		-		1	(ref.)	.	1	(ref.)	.
Routine and manual		-		1.187	0.885-1.593	0.252	1.166	0.868-1.566	0.307		-		1.06	0.862-1.303	0.583	1.061	0.862-1.307	0.575
Intermediate		-		1.668	1.198-2.322	0.002	1.598	1.149-2.222	0.005		-		0.796	0.643-0.986	0.037	0.801	0.646-0.994	0.044
Higher managerial, administrative and professional		-		2.83	2.041-3.926	<0.001	2.63	1.901-3.640	<0.001		-		0.711	0.582-0.868	0.001	0.722	0.591-0.883	0.002
Constant	2.064	1.612-2.642	<0.001	1.33	0.905-1.953	0.146	0.28	0.161-0.486	<0.001	0.613	0.520-0.722	<0.001	0.694	0.546-0.884	0.003	0.862	0.641-1.161	0.329
N	14184			14184			14184			9880			9880			9880
Other parents to talk to			0.909			0.944			0.948			<0.001			<0.001			<0.001
Disagree	1.046	0.794-1.377	0.751	1.041	0.787-1.377	0.779	1.039	0.786-1.374	0.788	1.015	0.868-1.185	0.856	1.027	0.879-1.200	0.738	1.024	0.876-1.197	0.763
Neither agree nor disagree	1	(ref.)	.	1	(ref.)	.	1	(ref.)	.	1	(ref.)	.	1	(ref.)	.	1	(ref.)	.
Agree	1.052	0.836-1.323	0.665	1.006	0.797-1.268	0.963	1.005	0.799-1.264	0.968	0.832	0.729-0.948	0.006	0.855	0.747-0.979	0.023	0.855	0.747-0.978	0.022
Job status (NS-SEC)						<0.001			<0.001						<0.001			<0.001
Not applicable		-		1	(ref.)	.	1	(ref.)	.		-		1	(ref.)	.	1	(ref.)	.
Routine and manual		-		1.153	0.844-1.575	0.37	1.132	0.827-1.549	0.439		-		1.147	0.909-1.448	0.249	1.151	0.910-1.456	0.239
Intermediate		-		1.594	1.129-2.249	0.008	1.522	1.078-2.148	0.017		-		0.858	0.676-1.089	0.209	0.866	0.681-1.101	0.24
Higher managerial, administrative and professional		-		2.802	1.989-3.946	<0.001	2.592	1.844-3.645	<0.001		-		0.766	0.612-0.957	0.019	0.78	0.623-0.977	0.03
Constant	1.858	1.354-2.549	<0.001	1.289	0.834-1.991	0.253	0.262	0.145-0.471	<0.001	0.662	0.533-0.822	<0.001	0.681	0.500-0.927	0.014	0.847	0.593-1.210	0.361
N	13476			13476			13476			9391			9391			9391
Feelings about neighbour friendliness			0.175			0.243			0.247			0.012			0.064			0.079
NA / Don't know / Can't say	0.693	0.492-0.977	0.036	0.731	0.514-1.041	0.082	0.742	0.524-1.051	0.093	1.146	0.920-1.427	0.224	1.121	0.905-1.390	0.295	1.114	0.900-1.379	0.32
Unfriendly	0.769	0.511-1.157	0.208	0.8	0.528-1.211	0.292	0.799	0.528-1.210	0.29	0.902	0.693-1.174	0.443	0.883	0.674-1.157	0.368	0.884	0.676-1.157	0.369
Neither friendly nor unfriendly	1	(ref.)	.	1	(ref.)	.	1	(ref.)	.	1	(ref.)	.	1	(ref.)	.	1	(ref.)	.
Friendly	0.901	0.754-1.077	0.254	0.864	0.721-1.036	0.114	0.859	0.717-1.029	0.098	0.901	0.815-0.996	0.042	0.925	0.837-1.024	0.132	0.927	0.838-1.025	0.14
Job status (NS-SEC)						<0.001			<0.001						<0.001			<0.001
Not applicable		-		1	(ref.)	.	1	(ref.)	.		-		1	(ref.)	.	1	(ref.)	.
Routine and manual		-		1.179	0.880-1.579	0.269	1.158	0.863-1.552	0.328		-		1.052	0.857-1.291	0.628	1.052	0.856-1.294	0.627
Intermediate		-		1.676	1.207-2.327	0.002	1.605	1.157-2.227	0.005		-		0.791	0.640-0.977	0.03	0.795	0.643-0.984	0.035
Higher managerial, administrative and professional		-		2.852	2.056-3.957	<0.001	2.65	1.914-3.669	<0.001		-		0.708	0.581-0.863	0.001	0.718	0.589-0.876	0.001
Constant	2.15	1.642-2.815	<0.001	1.445	0.973-2.147	0.068	0.306	0.174-0.538	<0.001	0.625	0.515-0.758	<0.001	0.699	0.538-0.909	0.008	0.869	0.638-1.183	0.373
N	14187			14187			14187			9883			9883			9883
Central heating in house
No central heating	0.752	0.600-0.942	0.013	0.837	0.665-1.053	0.129	0.853	0.679-1.071	0.172	0.908	0.797-1.036	0.152	0.872	0.765-0.994	0.041	0.869	0.763-0.988	0.033
Central heating	1	(ref.)	.	1	(ref.)	.	1	(ref.)	.	1	(ref.)	.	1	(ref.)	.	1	(ref.)	.
Job status (NS-SEC)						<0.001			<0.001						<0.001			<0.001
Not applicable		-		1	(ref.)	.	1	(ref.)	.		-		1	(ref.)	.	1	(ref.)	.
Routine and manual		-		1.203	0.900-1.607	0.212	1.179	0.881-1.577	0.268		-		1.059	0.862-1.301	0.586	1.06	0.862-1.305	0.58
Intermediate		-		1.696	1.223-2.353	0.002	1.623	1.171-2.249	0.004		-		0.793	0.642-0.980	0.032	0.798	0.645-0.988	0.038
Higher managerial, administrative and professional		-		2.865	2.064-3.976	<0.001	2.661	1.922-3.684	<0.001		-		0.701	0.575-0.855	<0.001	0.713	0.584-0.870	0.001
Constant	2.03	1.617-2.548	<0.001	1.287	0.886-1.871	0.185	0.271	0.157-0.468	<0.001	0.586	0.498-0.689	<0.001	0.67	0.527-0.852	0.001	0.834	0.620-1.121	0.229
N	14186			14186			14186			9882			9882			9882
Poor public transport			0.1			0.104			0.269			0.197			0.253			0.305
Very common	1.12	0.881-1.424	0.355	1.116	0.880-1.417	0.365	1.035	0.815-1.314	0.781	0.885	0.781-1.003	0.056	0.891	0.787-1.009	0.069	0.902	0.795-1.023	0.109
Fairly common	1.246	1.005-1.546	0.045	1.282	1.026-1.602	0.029	1.228	0.981-1.537	0.073	0.996	0.909-1.092	0.939	0.995	0.906-1.092	0.909	1.004	0.914-1.103	0.933
Not very common	0.987	0.844-1.155	0.875	1.012	0.863-1.186	0.884	0.997	0.850-1.170	0.974	0.992	0.911-1.080	0.854	0.986	0.904-1.076	0.752	0.993	0.909-1.084	0.87
Not at all common	1	(ref.)	.	1	(ref.)	.	1	(ref.)	.	1	(ref.)	.	1	(ref.)	.	1	(ref.)	.
Job status (NS-SEC)						<0.001			<0.001						<0.001			<0.001
Not applicable		-		1	(ref.)	.	1	(ref.)	.		-		1	(ref.)	.	1	(ref.)	.
Routine and manual		-		1.222	0.910-1.639	0.182	1.208	0.898-1.624	0.212		-		1.054	0.849-1.308	0.633	1.056	0.850-1.313	0.621
Intermediate		-		1.774	1.266-2.487	0.001	1.699	1.212-2.383	0.002		-		0.81	0.644-1.019	0.073	0.818	0.649-1.029	0.087
Higher managerial, administrative and professional		-		3.143	2.248-4.394	<0.001	2.915	2.085-4.075	<0.001		-		0.701	0.567-0.867	0.001	0.714	0.577-0.884	0.002
Constant	1.86	1.438-2.407	<0.001	1.125	0.754-1.679	0.564	0.26	0.137-0.492	<0.001	0.611	0.510-0.731	<0.001	0.698	0.535-0.910	0.008	0.872	0.637-1.193	0.391
N	12673			12673			12673			8742			8742			8742
Food shops and supermarkets that are easy to get to			0.23			0.349			0.195			0.246			0.254			0.359
Not at all common	0.931	0.720-1.203	0.583	0.95	0.737-1.225	0.692	0.907	0.703-1.170	0.452	0.872	0.753-1.011	0.069	0.873	0.751-1.016	0.079	0.886	0.764-1.028	0.111
Not very common	0.84	0.692-1.020	0.078	0.851	0.701-1.034	0.105	0.823	0.676-1.001	0.052	0.965	0.838-1.111	0.617	0.961	0.834-1.108	0.587	0.97	0.839-1.120	0.675
Fairly common	0.894	0.778-1.028	0.116	0.911	0.791-1.049	0.196	0.895	0.777-1.031	0.124	0.969	0.908-1.034	0.342	0.969	0.908-1.034	0.343	0.972	0.911-1.037	0.392
Very common	1	(ref.)	.	1	(ref.)	.	1	(ref.)	.	1	(ref.)	.	1	(ref.)	.	1	(ref.)	.
Job status (NS-SEC)						<0.001			<0.001						<0.001			<0.001
Not applicable		-		1	(ref.)	.	1	(ref.)	.		-		1	(ref.)	.	1	(ref.)	.
Routine and manual		-		1.186	0.885-1.590	0.253	1.161	0.866-1.558	0.319		-		1.053	0.855-1.296	0.63	1.054	0.854-1.300	0.624
Intermediate		-		1.684	1.211-2.341	0.002	1.608	1.158-2.232	0.005		-		0.789	0.637-0.978	0.031	0.794	0.640-0.986	0.037
Higher managerial, administrative and professional		-		2.861	2.058-3.977	<0.001	2.649	1.910-3.672	<0.001		-		0.703	0.574-0.859	0.001	0.714	0.583-0.875	0.001
Constant	2.069	1.655-2.587	<0.001	1.332	0.918-1.931	0.131	0.281	0.164-0.481	<0.001	0.595	0.505-0.701	<0.001	0.679	0.529-0.871	0.002	0.841	0.624-1.132	0.252
N	14177			14177			14177			9873			9873			9873
Volume of traffic			0.303			0.385			0.356			0.566			0.592			0.538
Heavy	1.422	0.985-2.051	0.06	1.371	0.959-1.959	0.084	1.4	0.969-2.023	0.073	0.951	0.823-1.099	0.499	0.965	0.833-1.119	0.64	0.959	0.829-1.110	0.576
Moderate	0.974	0.818-1.161	0.773	0.98	0.822-1.167	0.819	0.988	0.828-1.177	0.889	0.945	0.866-1.032	0.206	0.942	0.863-1.029	0.186	0.94	0.861-1.026	0.168
Light	1	(ref.)	.	1	(ref.)	.	1	(ref.)	.	1	(ref.)	.	1	(ref.)	.	1	(ref.)	.
No traffic permitted	1.002	0.761-1.319	0.989	1.004	0.764-1.320	0.975	0.985	0.752-1.292	0.914	0.973	0.863-1.096	0.648	0.984	0.876-1.106	0.79	0.992	0.884-1.113	0.888
Job status (NS-SEC)						<0.001			<0.001						<0.001			<0.001
Not applicable		-		1	(ref.)	.	1	(ref.)	.		-		1	(ref.)	.	1	(ref.)	.
Routine and manual		-		1.169	0.849-1.609	0.34	1.144	0.830-1.577	0.41		-		1.037	0.840-1.280	0.736	1.039	0.840-1.285	0.724
Intermediate		-		1.611	1.110-2.337	0.012	1.536	1.061-2.226	0.023		-		0.773	0.623-0.959	0.019	0.779	0.627-0.968	0.024
Higher managerial, administrative and professional		-		2.773	1.921-4.004	<0.001	2.565	1.780-3.696	<0.001		-		0.683	0.558-0.836	<0.001	0.695	0.567-0.852	<0.001
Constant	1.961	1.555-2.473	<0.001	1.306	0.874-1.951	0.193	0.268	0.155-0.466	<0.001	0.587	0.497-0.693	<0.001	0.681	0.532-0.872	0.002	0.888	0.652-1.209	0.451
N	13782			13782			13782			9594			9594			9594

## Sheet: SMT6. Edu M1-3 (all EQ vars)
	Initiation									Termination
	M1			M2			M3			M1			M2			M3
	Odds Ratio	95% Confidence Interval	P-value	Odds Ratio	95% Confidence Interval	P-value	Odds Ratio	95% Confidence Interval	P-value	Hazard Ratio	95% Confidence Interval	P-value	Hazard Ratio	95% Confidence Interval	P-value	Hazard Ratio	95% Confidence Interval	P-value
Subjective Environmental Quality	1.125	1.026-1.234	0.012	1.04	0.949-1.140	0.405	0.985	0.896-1.083	0.754	0.91	0.864-0.959	<0.001	0.94	0.891-0.991	0.023	0.952	0.900-1.007	0.089
Education (highest qualification)						<0.001			<0.001						<0.001			<0.001
None		-		1	(ref.)	.	1	(ref.)	.		-		1	(ref.)	.	1	(ref.)	.
Level 1 or 2		-		1.799	1.464-2.210	<0.001	1.752	1.428-2.150	<0.001		-		0.791	0.687-0.911	0.001	0.794	0.689-0.914	0.001
Levels 3 to 5 (inc. other and overseas)		-		2.814	2.289-3.459	<0.001	2.722	2.214-3.346	<0.001		-		0.605	0.518-0.706	<0.001	0.607	0.520-0.709	<0.001
Level 6 plus		-		5.967	4.573-7.787	<0.001	5.626	4.313-7.338	<0.001		-		0.524	0.454-0.606	<0.001	0.529	0.458-0.611	<0.001
Constant	1.079	0.677-1.718	0.749	0.674	0.409-1.112	0.123	0.187	0.099-0.354	<0.001	0.894	0.677-1.181	0.429	1.115	0.824-1.508	0.482	1.317	0.945-1.836	0.104
N	13866			13857			13857			9631			9625			9625
Objective Environmental Quality	2.086	1.651-2.634	<0.001	1.607	1.277-2.021	<0.001	1.46	1.164-1.832	0.001	0.783	0.703-0.872	<0.001	0.896	0.802-1.002	0.054	0.917	0.817-1.028	0.137
Education (highest qualification)						<0.001			<0.001						<0.001			<0.001
None		-		1	(ref.)	.	1	(ref.)	.		-		1	(ref.)	.	1	(ref.)	.
Level 1 or 2		-		1.721	1.398-2.118	<0.001	1.678	1.364-2.064	<0.001		-		0.796	0.688-0.922	0.002	0.799	0.690-0.924	0.002
Levels 3 to 5 (inc. other and overseas)		-		2.654	2.145-3.283	<0.001	2.578	2.084-3.190	<0.001		-		0.618	0.526-0.726	<0.001	0.62	0.528-0.727	<0.001
Level 6 plus		-		5.426	4.146-7.101	<0.001	5.149	3.935-6.738	<0.001		-		0.524	0.450-0.611	<0.001	0.529	0.454-0.615	<0.001
Constant	0.193	0.087-0.426	<0.001	0.202	0.090-0.457	<0.001	0.063	0.027-0.150	<0.001	1.275	0.900-1.808	0.172	1.189	0.829-1.706	0.347	1.422	0.974-2.135	0.067
N	13752			13742			13742			9573			9566			9566
Support sought since birth
No support sought	0.747	0.654-0.854	<0.001	0.79	0.692-0.901	<0.001	0.793	0.695-0.903	0.001	1.05	0.989-1.114	0.11	1.022	0.961-1.087	0.479	1.022	0.961-1.087	0.487
Support sought	1	(ref.)	.	1	(ref.)	.	1	(ref.)	.	1	(ref.)	.	1	(ref.)	.	1	(ref.)	.
Education (highest qualification)						<0.001			<0.001						<0.001			<0.001
None		-		1	(ref.)	.	1	(ref.)	.		-		1	(ref.)	.	1	(ref.)	.
Level 1 or 2		-		1.82	1.489-2.224	<0.001	1.759	1.440-2.149	<0.001		-		0.785	0.682-0.903	0.001	0.79	0.687-0.908	0.001
Levels 3 to 5 (inc. other and overseas)		-		2.894	2.363-3.545	<0.001	2.767	2.259-3.390	<0.001		-		0.6	0.514-0.699	<0.001	0.605	0.519-0.705	<0.001
Level 6 plus		-		6.072	4.635-7.956	<0.001	5.646	4.312-7.392	<0.001		-		0.512	0.443-0.591	<0.001	0.52	0.451-0.600	<0.001
Constant	2.181	1.729-2.750	<0.001	0.919	0.683-1.237	0.577	0.202	0.126-0.324	<0.001	0.569	0.483-0.671	<0.001	0.838	0.688-1.021	0.08	1.065	0.828-1.370	0.624
N	14185			14175			14175			9881			9874			9874
How often spent time with friends in the last week			0.005			0.032			0.039			<0.001			<0.001			<0.001
Not at all	0.86	0.724-1.020	0.084	0.899	0.753-1.074	0.242	0.904	0.758-1.079	0.263	0.982	0.915-1.055	0.622	0.962	0.895-1.034	0.288	0.959	0.893-1.030	0.254
1-2 times	1	(ref.)	.	1	(ref.)	.	1	(ref.)	.	1	(ref.)	.	1	(ref.)	.	1	(ref.)	.
3-6 times	1.073	0.903-1.276	0.422	1.047	0.877-1.250	0.609	1.042	0.873-1.243	0.648	0.826	0.762-0.896	<0.001	0.838	0.771-0.910	<0.001	0.839	0.773-0.912	<0.001
Everyday	0.744	0.603-0.918	0.006	0.768	0.620-0.951	0.015	0.77	0.622-0.953	0.016	0.919	0.807-1.048	0.207	0.928	0.814-1.059	0.269	0.931	0.815-1.062	0.286
Education (highest qualification)						<0.001			<0.001						<0.001			<0.001
None		-		1	(ref.)	.	1	(ref.)	.		-		1	(ref.)	.	1	(ref.)	.
Level 1 or 2		-		1.797	1.469-2.198	<0.001	1.739	1.422-2.128	<0.001		-		0.787	0.685-0.905	0.001	0.792	0.690-0.909	0.001
Levels 3 to 5 (inc. other and overseas)		-		2.876	2.343-3.530	<0.001	2.754	2.242-3.383	<0.001		-		0.604	0.519-0.704	<0.001	0.609	0.523-0.709	<0.001
Level 6 plus		-		6.079	4.635-7.973	<0.001	5.664	4.319-7.428	<0.001		-		0.515	0.447-0.594	<0.001	0.522	0.453-0.602	<0.001
Constant	2.064	1.612-2.642	<0.001	0.887	0.647-1.216	0.458	0.193	0.118-0.314	<0.001	0.613	0.520-0.722	<0.001	0.89	0.736-1.076	0.23	1.13	0.881-1.451	0.335
N	14184			14174			14174			9880			9873			9873
Other parents to talk to			0.909			0.925			0.926			<0.001			<0.001			<0.001
Disagree	1.046	0.794-1.377	0.751	1.039	0.781-1.383	0.792	1.039	0.781-1.381	0.794	1.015	0.868-1.185	0.856	1.029	0.880-1.203	0.723	1.026	0.877-1.200	0.751
Neither agree nor disagree	1	(ref.)	.	1	(ref.)	.	1	(ref.)	.	1	(ref.)	.	1	(ref.)	.	1	(ref.)	.
Agree	1.052	0.836-1.323	0.665	0.994	0.788-1.254	0.961	0.994	0.790-1.251	0.959	0.832	0.729-0.948	0.006	0.862	0.754-0.984	0.028	0.861	0.754-0.983	0.027
Education (highest qualification)						<0.001			<0.001						<0.001			<0.001
None		-		1	(ref.)	.	1	(ref.)	.		-		1	(ref.)	.	1	(ref.)	.
Level 1 or 2		-		1.873	1.525-2.300	<0.001	1.811	1.475-2.224	<0.001		-		0.764	0.661-0.882	<0.001	0.769	0.666-0.888	<0.001
Levels 3 to 5 (inc. other and overseas)		-		2.998	2.435-3.691	<0.001	2.869	2.329-3.533	<0.001		-		0.585	0.499-0.687	<0.001	0.59	0.503-0.693	<0.001
Level 6 plus		-		6.417	4.882-8.433	<0.001	5.966	4.542-7.838	<0.001		-		0.502	0.434-0.581	<0.001	0.51	0.441-0.591	<0.001
Constant	1.858	1.354-2.549	<0.001	0.807	0.559-1.165	0.252	0.169	0.101-0.285	<0.001	0.662	0.533-0.822	<0.001	0.963	0.752-1.234	0.765	1.218	0.906-1.626	0.191
N	13476			13467			13467			9391			9385			9385
Feelings about neighbour friendliness			0.175			0.316			0.33			0.012			0.073			0.089
NA / Don't know / Can't say	0.693	0.492-0.977	0.036	0.755	0.533-1.068	0.113	0.766	0.543-1.082	0.131	1.146	0.920-1.427	0.224	1.052	0.844-1.311	0.654	1.045	0.841-1.300	0.69
Unfriendly	0.769	0.511-1.157	0.208	0.777	0.515-1.172	0.229	0.78	0.517-1.176	0.236	0.902	0.693-1.174	0.443	0.889	0.680-1.162	0.389	0.89	0.681-1.164	0.395
Neither friendly nor unfriendly	1	(ref.)	.	1	(ref.)	.	1	(ref.)	.	1	(ref.)	.	1	(ref.)	.	1	(ref.)	.
Friendly	0.901	0.754-1.077	0.254	0.887	0.743-1.059	0.184	0.88	0.738-1.051	0.158	0.901	0.815-0.996	0.042	0.901	0.812-1.000	0.05	0.903	0.813-1.002	0.054
Education (highest qualification)						<0.001			<0.001						<0.001			<0.001
None		-		1	(ref.)	.	1	(ref.)	.		-		1	(ref.)	.	1	(ref.)	.
Level 1 or 2		-		1.817	1.484-2.225	<0.001	1.759	1.437-2.152	<0.001		-		0.792	0.688-0.913	0.001	0.797	0.693-0.917	0.002
Levels 3 to 5 (inc. other and overseas)		-		2.916	2.379-3.574	<0.001	2.792	2.277-3.423	<0.001		-		0.604	0.518-0.705	<0.001	0.609	0.522-0.710	<0.001
Level 6 plus		-		6.166	4.696-8.095	<0.001	5.739	4.373-7.532	<0.001		-		0.517	0.448-0.596	<0.001	0.524	0.455-0.604	<0.001
Constant	2.15	1.642-2.815	<0.001	0.93	0.668-1.293	0.665	0.204	0.124-0.337	<0.001	0.625	0.515-0.758	<0.001	0.909	0.728-1.135	0.401	1.152	0.882-1.505	0.3
N	14187			14177			14177			9883			9876			9876
Central heating in house
No central heating	0.752	0.600-0.942	0.013	0.833	0.672-1.033	0.095	0.852	0.687-1.055	0.141	0.908	0.797-1.036	0.152	0.877	0.768-1.001	0.051	0.872	0.765-0.994	0.041
Central heating	1	(ref.)	.	1	(ref.)	.	1	(ref.)	.	1	(ref.)	.	1	(ref.)	.	1	(ref.)	.
Education (highest qualification)						<0.001			<0.001						<0.001			<0.001
None		-		1	(ref.)	.	1	(ref.)	.		-		1	(ref.)	.	1	(ref.)	.
Level 1 or 2		-		1.814	1.488-2.210	<0.001	1.756	1.441-2.140	<0.001		-		0.78	0.677-0.898	0.001	0.785	0.682-0.903	0.001
Levels 3 to 5 (inc. other and overseas)		-		2.909	2.376-3.560	<0.001	2.786	2.275-3.412	<0.001		-		0.596	0.511-0.695	<0.001	0.601	0.516-0.701	<0.001
Level 6 plus		-		6.114	4.675-7.996	<0.001	5.699	4.359-7.451	<0.001		-		0.506	0.438-0.584	<0.001	0.514	0.446-0.593	<0.001
Constant	2.03	1.617-2.548	<0.001	0.859	0.646-1.142	0.296	0.187	0.117-0.300	<0.001	0.586	0.498-0.689	<0.001	0.865	0.714-1.049	0.141	1.1	0.856-1.415	0.456
N	14186			14176			14176			9882			9875			9875
Poor public transport			0.1			0.231			0.5			0.197			0.309			0.344
Very common	1.12	0.881-1.424	0.355	1.104	0.874-1.394	0.408	1.028	0.813-1.300	0.819	0.885	0.781-1.003	0.056	0.9	0.794-1.021	0.102	0.909	0.800-1.033	0.144
Fairly common	1.246	1.005-1.546	0.045	1.198	0.964-1.489	0.104	1.154	0.926-1.438	0.202	0.996	0.909-1.092	0.939	1	0.913-1.094	0.995	1.007	0.920-1.103	0.877
Not very common	0.987	0.844-1.155	0.875	0.993	0.844-1.168	0.932	0.982	0.834-1.156	0.83	0.992	0.911-1.080	0.854	0.993	0.912-1.081	0.866	0.998	0.916-1.088	0.964
Not at all common	1	(ref.)	.	1	(ref.)	.	1	(ref.)	.	1	(ref.)	.	1	(ref.)	.	1	(ref.)	.
Education (highest qualification)						<0.001			<0.001						<0.001			<0.001
None		-		1	(ref.)	.	1	(ref.)	.		-		1	(ref.)	.	1	(ref.)	.
Level 1 or 2		-		1.803	1.464-2.221	<0.001	1.743	1.416-2.146	<0.001		-		0.756	0.655-0.873	<0.001	0.761	0.660-0.878	<0.001
Levels 3 to 5 (inc. other and overseas)		-		2.789	2.261-3.439	<0.001	2.663	2.157-3.288	<0.001		-		0.552	0.466-0.654	<0.001	0.557	0.471-0.659	<0.001
Level 6 plus		-		6.521	4.900-8.679	<0.001	6.055	4.547-8.064	<0.001		-		0.467	0.399-0.548	<0.001	0.475	0.405-0.556	<0.001
Constant	1.86	1.438-2.407	<0.001	0.809	0.595-1.101	0.178	0.189	0.108-0.331	<0.001	0.611	0.510-0.731	<0.001	0.94	0.756-1.169	0.579	1.193	0.913-1.558	0.195
N	12673			12665			12665			8742			8736			8736
Food shops and supermarkets that are easy to get to			0.23			0.301			0.184			0.246			0.212			0.301
Not at all common	0.931	0.720-1.203	0.583	0.947	0.732-1.226	0.682	0.909	0.702-1.178	0.472	0.872	0.753-1.011	0.069	0.867	0.746-1.008	0.064	0.88	0.758-1.022	0.093
Not very common	0.84	0.692-1.020	0.078	0.864	0.710-1.052	0.146	0.839	0.689-1.022	0.082	0.965	0.838-1.111	0.617	0.956	0.829-1.102	0.532	0.963	0.834-1.112	0.609
Fairly common	0.894	0.778-1.028	0.116	0.892	0.777-1.025	0.108	0.88	0.766-1.011	0.072	0.969	0.908-1.034	0.342	0.962	0.899-1.029	0.257	0.964	0.901-1.031	0.286
Very common	1	(ref.)	.	1	(ref.)	.	1	(ref.)	.	1	(ref.)	.	1	(ref.)	.	1	(ref.)	.
Education (highest qualification)						<0.001			<0.001						<0.001			<0.001
None		-		1	(ref.)	.	1	(ref.)	.		-		1	(ref.)	.	1	(ref.)	.
Level 1 or 2		-		1.825	1.494-2.230	<0.001	1.763	1.445-2.152	<0.001		-		0.783	0.681-0.900	0.001	0.788	0.686-0.905	0.001
Levels 3 to 5 (inc. other and overseas)		-		2.934	2.394-3.597	<0.001	2.806	2.288-3.440	<0.001		-		0.599	0.514-0.697	<0.001	0.603	0.518-0.703	<0.001
Level 6 plus		-		6.182	4.723-8.093	<0.001	5.743	4.391-7.510	<0.001		-		0.509	0.442-0.587	<0.001	0.517	0.449-0.596	<0.001
Constant	2.069	1.655-2.587	<0.001	0.878	0.657-1.173	0.378	0.191	0.120-0.305	<0.001	0.595	0.505-0.701	<0.001	0.874	0.718-1.063	0.178	1.101	0.860-1.411	0.444
N	14177			14167			14167			9873			9866			9866
Volume of traffic			0.303			0.386			0.383			0.566			0.565			0.53
Heavy	1.422	0.985-2.051	0.06	1.372	0.944-1.994	0.097	1.394	0.950-2.045	0.09	0.951	0.823-1.099	0.499	0.944	0.811-1.098	0.452	0.939	0.809-1.090	0.409
Moderate	0.974	0.818-1.161	0.773	0.965	0.811-1.147	0.684	0.971	0.816-1.156	0.744	0.945	0.866-1.032	0.206	0.945	0.864-1.034	0.221	0.943	0.862-1.032	0.205
Light	1	(ref.)	.	1	(ref.)	.	1	(ref.)	.	1	(ref.)	.	1	(ref.)	.	1	(ref.)	.
No traffic permitted	1.002	0.761-1.319	0.989	1.027	0.781-1.350	0.851	1.008	0.768-1.322	0.955	0.973	0.863-1.096	0.648	0.969	0.858-1.094	0.613	0.976	0.865-1.101	0.694
Education (highest qualification)						<0.001			<0.001						<0.001			<0.001
None		-		1	(ref.)	.	1	(ref.)	.		-		1	(ref.)	.	1	(ref.)	.
Level 1 or 2		-		1.811	1.465-2.237	<0.001	1.747	1.416-2.156	<0.001		-		0.785	0.678-0.908	0.001	0.79	0.684-0.913	0.001
Levels 3 to 5 (inc. other and overseas)		-		2.865	2.317-3.541	<0.001	2.733	2.212-3.376	<0.001		-		0.603	0.515-0.707	<0.001	0.608	0.520-0.712	<0.001
Level 6 plus		-		6.017	4.576-7.912	<0.001	5.579	4.247-7.328	<0.001		-		0.51	0.439-0.591	<0.001	0.517	0.446-0.600	<0.001
Constant	1.961	1.555-2.473	<0.001	0.849	0.632-1.140	0.277	0.182	0.115-0.289	<0.001	0.587	0.497-0.693	<0.001	0.858	0.703-1.048	0.133	1.143	0.878-1.488	0.32
N	13782			13772			13772			9594			9587			9587

## Sheet: SMT7.All SES M1-3 (all EQvars)
	Initiation									Termination
	M1			M2			M3			M1			M2			M3
	Odds Ratio	95% Confidence Interval	P-value	Odds Ratio	95% Confidence Interval	P-value	Odds Ratio	95% Confidence Interval	P-value	Hazard Ratio	95% Confidence Interval	P-value	Hazard Ratio	95% Confidence Interval	P-value	Hazard Ratio	95% Confidence Interval	P-value
Subjective Environmental Quality	1.125	1.026-1.234	0.012	0.968	0.885-1.059	0.477	0.925	0.844-1.014	0.097	0.91	0.864-0.959	<0.001	0.958	0.907-1.012	0.124	0.969	0.915-1.025	0.273
Income (OECD equivalised quintiles)						0.016			0.042						0.77			0.663
Lowest		-		1	(ref.)	.	1	(ref.)	.		-		1	(ref.)	.	1	(ref.)	.
Second lowest		-		1.026	0.822-1.282	0.82	1.008	0.808-1.257	0.946		-		0.971	0.848-1.112	0.673	0.972	0.850-1.112	0.678
Middle		-		1.249	0.976-1.599	0.078	1.204	0.942-1.538	0.138		-		0.968	0.842-1.113	0.646	0.972	0.846-1.116	0.684
Second highest		-		1.493	1.148-1.940	0.003	1.428	1.099-1.856	0.008		-		0.999	0.873-1.144	0.989	1.007	0.880-1.152	0.917
Highest		-		1.507	1.078-2.105	0.016	1.41	1.008-1.974	0.045		-		1.025	0.897-1.172	0.714	1.039	0.908-1.188	0.583
Job status (NS-SEC)						0.002			0.004						<0.001			<0.001
Not applicable		-		1	(ref.)	.	1	(ref.)	.		-		1	(ref.)	.	1	(ref.)	.
Routine and manual		-		1.134	0.843-1.525	0.405	1.122	0.833-1.511	0.448		-		1.075	0.862-1.340	0.522	1.074	0.859-1.343	0.53
Intermediate		-		1.369	0.983-1.906	0.063	1.346	0.967-1.874	0.078		-		0.842	0.670-1.058	0.14	0.841	0.668-1.059	0.141
Higher managerial, administrative and professional		-		1.598	1.132-2.256	0.008	1.551	1.100-2.187	0.012		-		0.833	0.674-1.028	0.088	0.836	0.676-1.033	0.098
Education (highest qualification)						<0.001			<0.001						<0.001			<0.001
None		-		1	(ref.)	.	1	(ref.)	.		-		1	(ref.)	.	1	(ref.)	.
Level 1 or 2		-		1.617	1.317-1.986	<0.001	1.592	1.297-1.954	<0.001		-		0.815	0.712-0.933	0.003	0.816	0.713-0.933	0.003
Levels 3 to 5 (inc. other and overseas)		-		2.351	1.883-2.934	<0.001	2.313	1.850-2.891	<0.001		-		0.636	0.544-0.743	<0.001	0.636	0.545-0.743	<0.001
Level 6 plus		-		4.421	3.295-5.930	<0.001	4.294	3.196-5.769	<0.001		-		0.561	0.483-0.652	<0.001	0.563	0.485-0.654	<0.001
Constant	1.079	0.677-1.718	0.749	0.767	0.446-1.317	0.336	0.238	0.120-0.472	<0.001	0.894	0.677-1.181	0.429	1.047	0.726-1.511	0.805	1.215	0.816-1.811	0.338
N	13866			13843			13843			9631			9614			9614
Objective Environmental Quality	2.086	1.651-2.634	<0.001	1.396	1.121-1.739	0.003	1.296	1.042-1.612	0.02	0.783	0.703-0.872	<0.001	0.947	0.844-1.062	0.351	0.963	0.856-1.083	0.525
Income (OECD equivalised quintiles)						0.177			0.276						0.967			0.922
Lowest		-		1	(ref.)	.	1	(ref.)	.		-		1	(ref.)	.	1	(ref.)	.
Second lowest		-		0.975	0.784-1.213	0.823	0.961	0.774-1.193	0.718		-		0.996	0.868-1.143	0.955	0.996	0.869-1.141	0.952
Middle		-		1.155	0.904-1.475	0.25	1.117	0.876-1.423	0.373		-		0.984	0.854-1.133	0.82	0.987	0.859-1.136	0.86
Second highest		-		1.327	1.011-1.742	0.042	1.273	0.971-1.669	0.08		-		1.002	0.871-1.153	0.976	1.01	0.879-1.161	0.886
Highest		-		1.288	0.912-1.820	0.151	1.207	0.855-1.705	0.285		-		1.018	0.888-1.166	0.801	1.031	0.899-1.183	0.66
Job status (NS-SEC)						0.009			0.016						<0.001			<0.001
Not applicable		-		1	(ref.)	.	1	(ref.)	.		-		1	(ref.)	.	1	(ref.)	.
Routine and manual		-		1.064	0.779-1.454	0.697	1.056	0.772-1.443	0.735		-		1.045	0.842-1.297	0.692	1.046	0.841-1.300	0.688
Intermediate		-		1.201	0.835-1.728	0.323	1.182	0.822-1.699	0.366		-		0.817	0.652-1.024	0.08	0.819	0.653-1.028	0.085
Higher managerial, administrative and professional		-		1.479	1.020-2.144	0.039	1.44	0.994-2.085	0.054		-		0.805	0.655-0.990	0.04	0.81	0.658-0.997	0.047
Education (highest qualification)						<0.001			<0.001						<0.001			<0.001
None		-		1	(ref.)	.	1	(ref.)	.		-		1	(ref.)	.	1	(ref.)	.
Level 1 or 2		-		1.607	1.308-1.975	<0.001	1.582	1.287-1.944	<0.001		-		0.818	0.711-0.941	0.005	0.818	0.712-0.940	0.005
Levels 3 to 5 (inc. other and overseas)		-		2.341	1.865-2.938	<0.001	2.309	1.837-2.901	<0.001		-		0.648	0.553-0.760	<0.001	0.647	0.553-0.758	<0.001
Level 6 plus		-		4.293	3.173-5.808	<0.001	4.184	3.089-5.668	<0.001		-		0.563	0.482-0.657	<0.001	0.563	0.483-0.657	<0.001
Constant	0.193	0.087-0.426	<0.001	0.28	0.120-0.652	0.003	0.091	0.037-0.225	<0.001	1.275	0.900-1.808	0.172	1.046	0.694-1.577	0.829	1.253	0.802-1.956	0.322
N	13752			13727			13727			9573			9554			9554
Support sought since birth
No support sought	0.747	0.654-0.854	<0.001	0.787	0.690-0.898	<0.001	0.79	0.693-0.900	<0.001	1.05	0.989-1.114	0.11	1.016	0.958-1.079	0.592	1.016	0.958-1.079	0.592
Support sought	1	(ref.)	.	1	(ref.)	.	1	(ref.)	.	1	(ref.)	.	1	(ref.)	.	1	(ref.)	.
Income (OECD equivalised quintiles)						0.018			0.058						0.832			0.732
Lowest		-		1	(ref.)	.	1	(ref.)	.		-		1	(ref.)	.	1	(ref.)	.
Second lowest		-		1.029	0.825-1.282	0.803	1.007	0.809-1.253	0.952		-		0.971	0.848-1.111	0.665	0.973	0.851-1.112	0.687
Middle		-		1.258	0.982-1.612	0.07	1.201	0.940-1.536	0.143		-		0.956	0.833-1.097	0.522	0.963	0.840-1.104	0.589
Second highest		-		1.498	1.156-1.941	0.002	1.414	1.092-1.832	0.009		-		0.981	0.858-1.123	0.785	0.994	0.869-1.136	0.927
Highest		-		1.49	1.057-2.100	0.023	1.374	0.974-1.938	0.071		-		1.008	0.883-1.150	0.91	1.026	0.898-1.172	0.707
Job status (NS-SEC)						0.001			0.004						<0.001			<0.001
Not applicable		-		1	(ref.)	.	1	(ref.)	.		-		1	(ref.)	.	1	(ref.)	.
Routine and manual		-		1.105	0.833-1.467	0.489	1.093	0.823-1.452	0.537		-		1.072	0.865-1.329	0.525	1.074	0.865-1.334	0.518
Intermediate		-		1.312	0.946-1.820	0.103	1.282	0.926-1.777	0.135		-		0.837	0.668-1.050	0.124	0.84	0.669-1.055	0.134
Higher managerial, administrative and professional		-		1.58	1.128-2.214	0.008	1.524	1.089-2.131	0.014		-		0.83	0.676-1.020	0.077	0.837	0.680-1.029	0.092
Education (highest qualification)						<0.001			<0.001						<0.001			<0.001
None		-		1	(ref.)	.	1	(ref.)	.		-		1	(ref.)	.	1	(ref.)	.
Level 1 or 2		-		1.626	1.330-1.988	<0.001	1.596	1.305-1.953	<0.001		-		0.812	0.710-0.928	0.002	0.814	0.713-0.929	0.002
Levels 3 to 5 (inc. other and overseas)		-		2.386	1.917-2.970	<0.001	2.34	1.877-2.917	<0.001		-		0.635	0.544-0.740	<0.001	0.636	0.546-0.741	<0.001
Level 6 plus		-		4.404	3.262-5.946	<0.001	4.268	3.157-5.770	<0.001		-		0.553	0.476-0.641	<0.001	0.556	0.480-0.644	<0.001
Constant	2.181	1.729-2.750	<0.001	0.781	0.522-1.170	0.231	0.204	0.177-0.355	<0.001	0.569	0.483-0.671	<0.001	0.863	0.663-1.123	0.274	1.054	0.776-1.430	0.738
N	14185			14160			14160			9881			9862			9862
How often spent time with friends in the last week			0.005			0.093			0.093			<0.001			<0.001			<0.001
Not at all	0.86	0.724-1.020	0.084	0.926	0.778-1.103	0.388	0.927	0.780-1.102	0.391	0.982	0.915-1.055	0.622	0.961	0.895-1.031	0.269	0.96	0.895-1.030	0.252
1-2 times	1	(ref.)	.	1	(ref.)	.	1	(ref.)	.	1	(ref.)	.	1	(ref.)	.	1	(ref.)	.
3-6 times	1.073	0.903-1.276	0.422	1.048	0.878-1.252	0.603	1.043	0.874-1.245	0.641	0.826	0.762-0.896	<0.001	0.839	0.772-0.911	<0.001	0.84	0.773-0.912	<0.001
Everyday	0.744	0.603-0.918	0.006	0.795	0.638-0.992	0.042	0.792	0.635-0.987	0.038	0.919	0.807-1.048	0.207	0.918	0.804-1.048	0.206	0.921	0.806-1.052	0.225
Income (OECD equivalised quintiles)						0.026			0.076						0.821			0.725
Lowest	1	(ref.)	.	1	(ref.)	.		-		1	(ref.)	.	1	(ref.)	.
Second lowest	1.023	0.822-1.272	0.841	1.001	0.806-1.242	0.995		-		0.977	0.852-1.119	0.735	0.979	0.856-1.120	0.761
Middle	1.241	0.971-1.587	0.085	1.186	0.929-1.513	0.17		-		0.957	0.834-1.099	0.536	0.965	0.842-1.106	0.607
Second highest	1.474	1.139-1.908	0.003	1.392	1.076-1.802	0.012		-		0.984	0.858-1.127	0.813	0.996	0.870-1.141	0.956
Highest	1.452	1.026-2.054	0.035	1.339	0.946-1.896	0.1		-		1.012	0.886-1.156	0.858	1.031	0.901-1.178	0.66
Job status (NS-SEC)						0.002			0.004						<0.001			<0.001
Not applicable	1	(ref.)	.	1	(ref.)	.		-		1	(ref.)	.	1	(ref.)	.
Routine and manual	1.093	0.819-1.460	0.545	1.083	0.810-1.448	0.59		-		1.08	0.871-1.338	0.486	1.082	0.871-1.344	0.479
Intermediate	1.297	0.932-1.804	0.123	1.268	0.912-1.763	0.158		-		0.843	0.672-1.059	0.143	0.847	0.673-1.065	0.154
Higher managerial, administrative and professional	1.561	1.110-2.193	0.01	1.506	1.073-2.112	0.018		-		0.837	0.681-1.030	0.093	0.844	0.685-1.040	0.111
Education (highest qualification)						<0.001			<0.001						<0.001			<0.001
None		-		1	(ref.)	.	1	(ref.)	.		-		1	(ref.)	.	1	(ref.)	.
Level 1 or 2		-		1.617	1.321-1.981	<0.001	1.589	1.297-1.947	<0.001		-		0.813	0.712-0.929	0.002	0.815	0.714-0.930	0.002
Levels 3 to 5 (inc. other and overseas)		-		2.392	1.917-2.986	<0.001	2.348	1.879-2.936	<0.001		-		0.639	0.548-0.744	<0.001	0.64	0.550-0.744	<0.001
Level 6 plus		-		4.467	3.302-6.044	<0.001	4.333	3.198-5.870	<0.001		-		0.556	0.479-0.644	<0.001	0.558	0.482-0.646	<0.001
Constant	2.064	1.612-2.642	<0.001	0.753	0.497-1.139	0.178	0.193	0.110-0.339	<0.001	0.613	0.520-0.722	<0.001	0.908	0.701-1.177	0.467	1.107	0.818-1.500	0.51
N	14184			14159			14159			9880			9861			9861
Other parents to talk to			0.909			0.719			0.75			<0.001			<0.001			<0.001
Disagree	1.046	0.794-1.377	0.751	1.072	0.804-1.428	0.636	1.067	0.801-1.420	0.659	1.015	0.868-1.185	0.856	1.023	0.874-1.197	0.775	1.02	0.872-1.193	0.806
Neither agree nor disagree	1	(ref.)	.	1	(ref.)	.	1	(ref.)	.	1	(ref.)	.	1	(ref.)	.	1	(ref.)	.
Agree	1.052	0.836-1.323	0.665	0.978	0.773-1.239	0.856	0.979	0.775-1.238	0.862	0.832	0.729-0.948	0.006	0.863	0.755-0.987	0.032	0.861	0.754-0.984	0.028
Income (OECD equivalised quintiles)						0.017			0.057						0.743			0.635
Lowest		-		1	(ref.)	.	1	(ref.)	.		-		1	(ref.)	.	1	(ref.)	.
Second lowest		-		1.092	0.873-1.366	0.441	1.067	0.855-1.332	0.567		-		0.951	0.823-1.099	0.494	0.955	0.828-1.102	0.532
Middle		-		1.323	1.033-1.696	0.027	1.264	0.989-1.615	0.061		-		0.944	0.814-1.095	0.446	0.953	0.823-1.105	0.527
Second highest		-		1.552	1.191-2.022	0.001	1.463	1.124-1.905	0.005		-		0.969	0.838-1.121	0.676	0.984	0.851-1.137	0.825
Highest		-		1.575	1.115-2.224	0.01	1.449	1.025-2.046	0.035		-		1.001	0.869-1.154	0.987	1.022	0.885-1.179	0.769
Job status (NS-SEC)						0.004			0.011						<0.001			<0.001
Not applicable		-		1	(ref.)	.	1	(ref.)	.		-		1	(ref.)	.	1	(ref.)	.
Routine and manual		-		1.044	0.766-1.422	0.785	1.033	0.758-1.409	0.836		-		1.172	0.921-1.490	0.196	1.177	0.924-1.500	0.187
Intermediate		-		1.205	0.851-1.706	0.293	1.175	0.830-1.662	0.363		-		0.915	0.713-1.175	0.487	0.921	0.717-1.184	0.522
Higher managerial, administrative and professional		-		1.491	1.042-2.134	0.029	1.433	1.003-2.047	0.048		-		0.903	0.719-1.135	0.382	0.913	0.726-1.148	0.437
Education (highest qualification)						<0.001			<0.001						<0.001			<0.001
None		-		1	(ref.)	.	1	(ref.)	.		-		1	(ref.)	.	1	(ref.)	.
Level 1 or 2		-		1.685	1.372-2.069	<0.001	1.655	1.347-2.034	<0.001		-		0.787	0.687-0.902	0.001	0.789	0.690-0.903	0.001
Levels 3 to 5 (inc. other and overseas)		-		2.485	1.991-3.101	<0.001	2.441	1.953-3.051	<0.001		-		0.618	0.528-0.724	<0.001	0.619	0.529-0.725	<0.001
Level 6 plus		-		4.659	3.452-6.286	<0.001	4.521	3.347-6.107	<0.001		-		0.541	0.465-0.628	<0.001	0.544	0.468-0.631	<0.001
Constant	1.858	1.354-2.549	<0.001	0.714	0.459-1.113	0.137	0.178	0.098-0.322	<0.001	0.662	0.533-0.822	<0.001	0.918	0.657-1.282	0.615	1.118	0.772-1.620	0.555
N	13476			13456			13456			9391			9377			9377
Feelings about neighbour friendliness			0.175			0.276			0.275			0.012			0.116			0.122
NA / Don't know / Can't say	0.693	0.492-0.977	0.036	0.768	0.542-1.089	0.139	0.776	0.549-1.098	0.152	1.146	0.920-1.427	0.224	1.057	0.848-1.317	0.624	1.053	0.847-1.308	0.644
Unfriendly	0.769	0.511-1.157	0.208	0.809	0.539-1.214	0.306	0.806	0.536-1.212	0.3	0.902	0.693-1.174	0.443	0.879	0.671-1.150	0.346	0.881	0.673-1.152	0.354
Neither friendly nor unfriendly	1	(ref.)	.	1	(ref.)	.	1	(ref.)	.	1	(ref.)	.	1	(ref.)	.	1	(ref.)	.
Friendly	0.901	0.754-1.077	0.254	0.853	0.710-1.025	0.089	0.85	0.707-1.020	0.081	0.901	0.815-0.996	0.042	0.913	0.823-1.014	0.088	0.914	0.823-1.014	0.089
Income (OECD equivalised quintiles)						0.02			0.06						0.786			0.67
Lowest		-		1	(ref.)	.	1	(ref.)	.		-		1	(ref.)	.	1	(ref.)	.
Second lowest		-		1.031	0.828-1.283	0.785	1.009	0.812-1.254	0.936		-		0.968	0.845-1.108	0.632	0.97	0.849-1.108	0.649
Middle		-		1.259	0.983-1.613	0.068	1.203	0.941-1.537	0.141		-		0.956	0.832-1.097	0.52	0.962	0.839-1.103	0.582
Second highest		-		1.505	1.159-1.954	0.002	1.421	1.095-1.845	0.008		-		0.985	0.860-1.128	0.827	0.997	0.871-1.141	0.964
Highest		-		1.484	1.049-2.098	0.026	1.368	0.967-1.936	0.077		-		1.012	0.887-1.155	0.856	1.03	0.902-1.177	0.662
Job status (NS-SEC)						0.001			0.003						<0.001			<0.001
Not applicable		-		1	(ref.)	.	1	(ref.)	.		-		1	(ref.)	.	1	(ref.)	.
Routine and manual		-		1.083	0.814-1.441	0.583	1.073	0.806-1.428	0.631		-		1.073	0.866-1.329	0.52	1.074	0.865-1.334	0.516
Intermediate		-		1.292	0.934-1.788	0.122	1.264	0.914-1.748	0.157		-		0.839	0.669-1.052	0.129	0.841	0.670-1.057	0.138
Higher managerial, administrative and professional		-		1.558	1.113-2.181	0.01	1.503	1.076-2.101	0.017		-		0.834	0.679-1.026	0.086	0.84	0.683-1.034	0.101
Education (highest qualification)						<0.001			<0.001						<0.001			<0.001
None		-		1	(ref.)	.	1	(ref.)	.		-		1	(ref.)	.	1	(ref.)	.
Level 1 or 2		-		1.631	1.332-1.996	<0.001	1.602	1.308-1.962	<0.001		-		0.818	0.715-0.937	0.004	0.82	0.717-0.937	0.004
Levels 3 to 5 (inc. other and overseas)		-		2.412	1.936-3.006	<0.001	2.367	1.897-2.954	<0.001		-		0.638	0.546-0.745	<0.001	0.639	0.548-0.745	<0.001
Level 6 plus		-		4.489	3.320-6.070	<0.001	4.351	3.213-5.891	<0.001		-		0.556	0.479-0.645	<0.001	0.558	0.481-0.647	<0.001
Constant	2.15	1.642-2.815	<0.001	0.822	0.544-1.241	0.351	0.213	0.121-0.378	<0.001	0.625	0.515-0.758	<0.001	0.925	0.698-1.226	0.588	1.132	0.824-1.554	0.444
N	14187			14162			14162			9883			9864			9864
Central heating in house
No central heating	0.752	0.600-0.942	0.013	0.898	0.723-1.116	0.332	0.907	0.731-1.126	0.377	0.908	0.797-1.036	0.152	0.863	0.757-0.984	0.027	0.862	0.757-0.981	0.024
Central heating	1	(ref.)	.	1	(ref.)	.	1	(ref.)	.	1	(ref.)	.	1	(ref.)	.	1	(ref.)	.
Income (OECD equivalised quintiles)						0.025			0.074						0.855			0.779
Lowest		-		1	(ref.)	.	1	(ref.)	.		-		1	(ref.)	.	1	(ref.)	.
Second lowest		-		1.034	0.831-1.286	0.764	1.012	0.815-1.256	0.916		-		0.966	0.843-1.106	0.614	0.968	0.847-1.107	0.633
Middle		-		1.258	0.984-1.609	0.067	1.202	0.942-1.534	0.139		-		0.946	0.823-1.086	0.431	0.953	0.831-1.093	0.49
Second highest		-		1.491	1.149-1.933	0.003	1.408	1.086-1.826	0.01		-		0.965	0.844-1.104	0.608	0.978	0.855-1.117	0.739
Highest		-		1.472	1.046-2.073	0.027	1.358	0.964-1.914	0.08		-		0.991	0.868-1.131	0.893	1.009	0.884-1.152	0.894
Job status (NS-SEC)						0.002			0.005						<0.001			<0.001
Not applicable		-		1	(ref.)	.	1	(ref.)	.		-		1	(ref.)	.	1	(ref.)	.
Routine and manual		-		1.096	0.824-1.458	0.529	1.084	0.814-1.443	0.58		-		1.08	0.871-1.339	0.484	1.082	0.871-1.344	0.479
Intermediate		-		1.302	0.939-1.805	0.113	1.272	0.918-1.763	0.148		-		0.844	0.673-1.057	0.139	0.847	0.675-1.062	0.151
Higher managerial, administrative and professional		-		1.563	1.114-2.193	0.01	1.507	1.076-2.112	0.017		-		0.833	0.679-1.023	0.082	0.84	0.683-1.033	0.098
Education (highest qualification)						<0.001			<0.001						<0.001			<0.001
None		-		1	(ref.)	.	1	(ref.)	.		-		1	(ref.)	.	1	(ref.)	.
Level 1 or 2		-		1.629	1.335-1.988	<0.001	1.601	1.311-1.954	<0.001		-		0.808	0.706-0.924	0.002	0.81	0.709-0.925	0.002
Levels 3 to 5 (inc. other and overseas)		-		2.413	1.939-3.004	<0.001	2.368	1.900-2.952	<0.001		-		0.634	0.544-0.738	<0.001	0.635	0.545-0.739	<0.001
Level 6 plus		-		4.49	3.326-6.061	<0.001	4.354	3.221-5.886	<0.001		-		0.55	0.474-0.638	<0.001	0.553	0.477-0.640	<0.001
Constant	2.03	1.617-2.548	<0.001	0.724	0.488-1.074	0.108	0.186	0.107-0.324	<0.001	0.586	0.498-0.689	<0.001	0.888	0.684-1.152	0.371	1.078	0.795-1.463	0.628
N	14186			14161			14161			9882			9863			9863
Poor public transport			0.1			0.17			0.427			0.197			0.309			0.349
Very common	1.12	0.881-1.424	0.355	1.127	0.891-1.425	0.319	1.043	0.823-1.322	0.725	0.885	0.781-1.003	0.056	0.901	0.795-1.021	0.102	0.91	0.802-1.033	0.146
Fairly common	1.246	1.005-1.546	0.045	1.233	0.987-1.542	0.065	1.182	0.943-1.482	0.146	0.996	0.909-1.092	0.939	0.999	0.911-1.096	0.982	1.007	0.917-1.105	0.887
Not very common	0.987	0.844-1.155	0.875	1.006	0.855-1.184	0.94	0.993	0.843-1.168	0.929	0.992	0.911-1.080	0.854	0.991	0.908-1.082	0.839	0.997	0.912-1.089	0.94
Not at all common	1	(ref.)	.	1	(ref.)	.	1	(ref.)	.	1	(ref.)	.	1	(ref.)	.	1	(ref.)	.
Income (OECD equivalised quintiles)						0.006			0.03						0.924			0.874
Lowest		-		1	(ref.)	.	1	(ref.)	.		-		1	(ref.)	.	1	(ref.)	.
Second lowest		-		1.083	0.866-1.356	0.484	1.057	0.847-1.320	0.622		-		0.989	0.865-1.131	0.872	0.991	0.868-1.131	0.89
Middle		-		1.325	1.028-1.707	0.03	1.257	0.978-1.616	0.074		-		0.963	0.835-1.110	0.603	0.969	0.840-1.116	0.66
Second highest		-		1.574	1.209-2.049	0.001	1.475	1.134-1.919	0.004		-		1.001	0.874-1.146	0.987	1.012	0.884-1.159	0.863
Highest		-		1.662	1.159-2.384	0.006	1.516	1.056-2.175	0.024		-		1.003	0.880-1.144	0.959	1.019	0.893-1.163	0.779
Job status (NS-SEC)						0.001			0.003						<0.001			0.001
Not applicable		-		1	(ref.)	.	1	(ref.)	.		-		1	(ref.)	.	1	(ref.)	.
Routine and manual		-		1.114	0.831-1.494	0.47	1.111	0.827-1.493	0.484		-		1.077	0.857-1.353	0.524	1.08	0.858-1.359	0.513
Intermediate		-		1.352	0.962-1.901	0.083	1.325	0.941-1.864	0.107		-		0.871	0.680-1.114	0.271	0.875	0.683-1.121	0.292
Higher managerial, administrative and professional		-		1.664	1.174-2.358	0.004	1.61	1.136-2.283	0.007		-		0.847	0.679-1.058	0.144	0.855	0.684-1.069	0.17
Education (highest qualification)						<0.001			<0.001						<0.001			<0.001
None		-		1	(ref.)	.	1	(ref.)	.		-		1	(ref.)	.	1	(ref.)	.
Level 1 or 2		-		1.579	1.284-1.942	<0.001	1.554	1.264-1.912	<0.001		-		0.779	0.678-0.896	<0.001	0.781	0.680-0.897	<0.001
Levels 3 to 5 (inc. other and overseas)		-		2.236	1.784-2.802	<0.001	2.198	1.751-2.761	<0.001		-		0.582	0.491-0.690	<0.001	0.584	0.493-0.691	<0.001
Level 6 plus		-		4.478	3.296-6.082	<0.001	4.364	3.205-5.943	<0.001		-		0.506	0.428-0.598	<0.001	0.508	0.430-0.600	<0.001
Constant	1.86	1.438-2.407	<0.001	0.657	0.433-0.997	0.048	0.187	0.099-0.354	<0.001	0.611	0.510-0.731	<0.001	0.949	0.709-1.268	0.722	1.154	0.832-1.601	0.391
N	12673			12651			12651			8742			8725			8725
Food shops and supermarkets that are easy to get to			0.23			0.435			0.253			0.246			0.226			0.328
Not at all common	0.931	0.720-1.203	0.583	0.962	0.744-1.245	0.771	0.916	0.707-1.187	0.506	0.872	0.753-1.011	0.069	0.872	0.750-1.015	0.077	0.885	0.762-1.029	0.111
Not very common	0.84	0.692-1.020	0.078	0.874	0.717-1.065	0.181	0.842	0.691-1.027	0.091	0.965	0.838-1.111	0.617	0.95	0.823-1.096	0.483	0.958	0.828-1.108	0.559
Fairly common	0.894	0.778-1.028	0.116	0.911	0.794-1.045	0.184	0.896	0.781-1.028	0.117	0.969	0.908-1.034	0.342	0.962	0.900-1.029	0.262	0.964	0.901-1.032	0.296
Very common	1	(ref.)	.	1	(ref.)	.	1	(ref.)	.	1	(ref.)	.	1	(ref.)	.	1	(ref.)	.
Income (OECD equivalised quintiles)						0.022			0.069						0.846			0.745
Lowest		-		1	(ref.)	.	1	(ref.)	.		-		1	(ref.)	.	1	(ref.)	.
Second lowest		-		1.038	0.832-1.294	0.742	1.015	0.816-1.263	0.893		-		0.968	0.846-1.107	0.635	0.97	0.849-1.108	0.653
Middle		-		1.261	0.985-1.613	0.066	1.202	0.942-1.534	0.139		-		0.953	0.832-1.092	0.487	0.959	0.838-1.098	0.547
Second highest		-		1.498	1.156-1.941	0.002	1.413	1.091-1.830	0.009		-		0.976	0.854-1.116	0.724	0.988	0.866-1.129	0.864
Highest		-		1.478	1.047-2.085	0.026	1.36	0.964-1.920	0.08		-		1.002	0.879-1.142	0.974	1.021	0.894-1.165	0.762
Job status (NS-SEC)						0.002			0.004						<0.001			<0.001
Not applicable		-		1	(ref.)	.	1	(ref.)	.		-		1	(ref.)	.	1	(ref.)	.
Routine and manual		-		1.086	0.814-1.449	0.575	1.072	0.803-1.432	0.635		-		1.073	0.864-1.333	0.526	1.075	0.863-1.338	0.519
Intermediate		-		1.294	0.932-1.798	0.124	1.263	0.910-1.752	0.163		-		0.838	0.666-1.053	0.13	0.841	0.668-1.059	0.141
Higher managerial, administrative and professional		-		1.558	1.107-2.191	0.011	1.499	1.067-2.105	0.019		-		0.832	0.675-1.024	0.083	0.838	0.680-1.034	0.1
Education (highest qualification)						<0.001			<0.001						<0.001			<0.001
None		-		1	(ref.)	.	1	(ref.)	.		-		1	(ref.)	.	1	(ref.)	.
Level 1 or 2		-		1.634	1.338-1.997	<0.001	1.604	1.312-1.959	<0.001		-		0.81	0.710-0.925	0.002	0.812	0.712-0.926	0.002
Levels 3 to 5 (inc. other and overseas)		-		2.423	1.945-3.019	<0.001	2.377	1.905-2.965	<0.001		-		0.634	0.545-0.738	<0.001	0.635	0.546-0.739	<0.001
Level 6 plus		-		4.504	3.333-6.086	<0.001	4.36	3.222-5.899	<0.001		-		0.551	0.475-0.638	<0.001	0.553	0.478-0.641	<0.001
Constant	2.069	1.655-2.587	<0.001	0.748	0.502-1.113	0.152	0.194	0.112-0.335	<0.001	0.595	0.505-0.701	<0.001	0.898	0.684-1.178	0.438	1.087	0.799-1.478	0.595
N	14177			14152			14152			9873			9854			9854
Volume of traffic			0.303			0.398			0.384			0.566			0.57			0.53
Heavy	1.422	0.985-2.051	0.06	1.375	0.947-1.995	0.094	1.4	0.956-2.052	0.084	0.951	0.823-1.099	0.499	0.95	0.817-1.106	0.509	0.945	0.814-1.098	0.462
Moderate	0.974	0.818-1.161	0.773	0.979	0.822-1.166	0.81	0.985	0.826-1.174	0.865	0.945	0.866-1.032	0.206	0.943	0.862-1.031	0.198	0.941	0.860-1.030	0.188
Light	1	(ref.)	.	1	(ref.)	.	1	(ref.)	.	1	(ref.)	.	1	(ref.)	.	1	(ref.)	.
No traffic permitted	1.002	0.761-1.319	0.989	1.03	0.783-1.355	0.833	1.008	0.767-1.323	0.956	0.973	0.863-1.096	0.648	0.985	0.875-1.109	0.803	0.992	0.882-1.116	0.89
Income (OECD equivalised quintiles)						0.029			0.085						0.972			0.931
Lowest		-		1	(ref.)	.	1	(ref.)	.		-		1	(ref.)	.	1	(ref.)	.
Second lowest		-		1.012	0.814-1.259	0.914	0.989	0.797-1.227	0.922		-		0.982	0.857-1.126	0.8	0.985	0.861-1.127	0.824
Middle		-		1.249	0.986-1.583	0.066	1.19	0.941-1.503	0.146		-		0.968	0.841-1.113	0.647	0.976	0.849-1.121	0.729
Second highest		-		1.462	1.127-1.896	0.004	1.378	1.063-1.787	0.016		-		0.984	0.857-1.130	0.822	0.997	0.869-1.144	0.968
Highest		-		1.432	1.020-2.012	0.038	1.315	0.936-1.849	0.115		-		0.998	0.874-1.140	0.982	1.018	0.890-1.164	0.797
Job status (NS-SEC)						0.005			0.012						<0.001			<0.001
Not applicable		-		1	(ref.)	.	1	(ref.)	.		-		1	(ref.)	.	1	(ref.)	.
Routine and manual		-		1.076	0.789-1.469	0.643	1.064	0.779-1.453	0.698		-		1.054	0.847-1.311	0.639	1.056	0.847-1.317	0.627
Intermediate		-		1.253	0.870-1.805	0.225	1.222	0.849-1.758	0.281		-		0.817	0.650-1.027	0.083	0.821	0.652-1.034	0.093
Higher managerial, administrative and professional		-		1.536	1.058-2.229	0.024	1.478	1.019-2.143	0.039		-		0.808	0.656-0.996	0.046	0.815	0.660-1.006	0.057
Education (highest qualification)						<0.001			<0.001						<0.001			<0.001
None		-		1	(ref.)	.	1	(ref.)	.		-		1	(ref.)	.	1	(ref.)	.
Level 1 or 2		-		1.636	1.332-2.009	<0.001	1.604	1.307-1.970	<0.001		-		0.814	0.709-0.934	0.003	0.815	0.711-0.935	0.003
Levels 3 to 5 (inc. other and overseas)		-		2.398	1.921-2.995	<0.001	2.347	1.879-2.933	<0.001		-		0.642	0.548-0.751	<0.001	0.643	0.550-0.752	<0.001
Level 6 plus		-		4.434	3.280-5.993	<0.001	4.285	3.168-5.797	<0.001		-		0.556	0.477-0.648	<0.001	0.559	0.480-0.650	<0.001
Constant	1.961	1.555-2.473	<0.001	0.738	0.480-1.136	0.168	0.186	0.106-0.327	<0.001	0.587	0.497-0.693	<0.001	0.891	0.681-1.167	0.401	1.135	0.824-1.563	0.44
N	13782			13757			13757			9594			9575			9575
